# Supplementary material for: Molecular clustering of genes related to the atopic syndrome: Towards a more tailored approach and personalized medicine?
Source: PubMed Central journal article supplement (PMC6617681; doi:10.1186/s13601-019-0273-8), 2019-07-10
Supplement: 13601_2019_273_MOESM1_ESM.pdf [file 13601_2019_273_MOESM1_ESM.pdf]

**Additional File 1: Table S1. Atopy-related genes from the Human Gene Mutation Database**

| Gene symbol               | Gene description                                                          | Atopic symptom involved            | Number of atopy mutations | Cluster* |
|---------------------------|---------------------------------------------------------------------------|------------------------------------|---------------------------|----------|
| <i>ADCYAP1R1</i>          | Adenylate Cyclase Activating Polypeptide 1 Receptor Type I                | Asthma                             | NA                        | A        |
| <i>CCL11</i>              | C-C Motif Chemokine Ligand 11                                             | Asthma                             | NA                        | A        |
| <i>COL6A5</i>             | Collagen Type VI Alpha 5 Chain                                            | Dermatitis                         | 4                         | A        |
| <i>CTNNA3</i>             | Catenin Alpha 3                                                           | Food allergy                       | 2                         | A        |
| <i>FRMD6</i>              | FERM Domain Containing 6                                                  | Asthma                             | 1                         | A        |
| <i>KCNMB1</i>             | Potassium Calcium-Activated Channel Subfamily M Regulatory Beta Subunit 1 | Asthma                             | 1                         | A        |
| <i>LRRC32</i>             | Leucine Rich Repeat Containing 32                                         | Dermatitis                         | 6                         | A        |
| <i>MYLK</i>               | Myosin Light Chain Kinase                                                 | Asthma                             | 1                         | A        |
| <i>NGFR</i>               | Nerve Growth Factor Receptor                                              | Asthma                             | NA                        | A        |
| <i>SELP</i>               | Selectin P                                                                | Atopy                              | 1                         | A        |
| <i>SERPINA1</i>           | Serpin Family A Member 1                                                  | Asthma                             | 1                         | A        |
| <i>SERPINE1</i>           | Serpin Family E Member 1                                                  | Asthma                             | NA                        | A        |
| <i>ST5</i>                | Suppression Of Tumorigenicity 5                                           | Asthma                             | 1                         | A        |
| <i>TWIST1</i>             | Twist Family BHLH Transcription Factor 1                                  | IgE                                | NA                        | A        |
| <i>PARP1</i>              | Poly(ADP-Ribose) Polymerase 1                                             | Asthma                             | NA                        | B        |
| <i>TUFM</i>               | Tu Translation Elongation Factor, Mitochondrial                           | Asthma                             | 1                         | B        |
| <i>FCERIA</i>             | Fc Fragment Of IgE Receptor Ia                                            | Dermatitis                         | 1                         | C        |
| <i>HRH4</i>               | Histamine Receptor H4                                                     | Dermatitis                         | NA                        | C        |
| <i>IL1RL1</i>             | Interleukin 1 Receptor Like 1                                             | Dermatitis                         | 2                         | C        |
| <i>IL4</i>                | Interleukin 4                                                             | IgE<br>Asthma                      | 3                         | C        |
| <i>IL13</i>               | Interleukin 13                                                            | Atopy<br>IgE<br>Asthma<br>Rhinitis | 2                         | C        |
| <i>MS4A2</i>              | Membrane Spanning 4-Domains A2                                            | Atopy<br>IgE<br>Asthma<br>Rhinitis | 5                         | C        |
| <i>SLC6A12</i>            | Solute Carrier Family 6 Member 12                                         | Asthma                             | 1                         | C        |
| <i>ADRB2</i>              | Adrenoceptor Beta 2                                                       | Dermatitis<br>Asthma               | 2                         | D        |
| <i>ALOX5</i>              | Arachidonate 5-Lipoxygenase                                               | Asthma                             | 1                         | D        |
| <i>ARPC1B<sup>†</sup></i> | Actin Related Protein 2/3 Complex Subunit 1B                              | Allergy                            | 1                         | D        |
| <i>BTK<sup>‡</sup></i>    | Bruton Tyrosine Kinase                                                    | Asthma                             | 1                         | D        |
| <i>CD14</i>               | Cluster of Differentiation 14 Molecule                                    | Asthma<br>Rhinitis                 | NA                        | D        |
| <i>CD86</i>               | Cluster of Differentiation 86 Molecule                                    | Asthma                             | 1                         | D        |
| <i>CSF1R</i>              | Colony Stimulating Factor 1 Receptor                                      | Asthma                             | 1                         | D        |
| <i>CYSLTR1</i>            | Cysteinyl Leukotriene Receptor 1                                          | Atopy<br>Asthma                    | 2                         | D        |

|                             |                                                        |                                 |    |   |
|-----------------------------|--------------------------------------------------------|---------------------------------|----|---|
| <i>FCGR2B</i>               | Fc Fragment Of IgE Receptor Iib                        | Atopy                           | NA | D |
| <i>HLX</i>                  | H2.0 Like Homeobox                                     | Asthma                          | 2  | D |
| <i>HNMT</i>                 | Histamine N-Methyltransferase                          | Dermatitis<br>Asthma            | NA | D |
| <i>IL6R</i>                 | Interleukin 6 Receptor                                 | Dermatitis                      | NA | D |
| <i>IL18</i>                 | Interleukin 18                                         | Asthma                          | 1  | D |
| <i>INPP4A</i>               | Inositol Polyphosphate-4-Phosphatase Type I A          | Asthma                          | 1  | D |
| <i>IRAK3</i>                | Interleukin 1 Receptor Associated Kinase 3             | Asthma                          | 2  | D |
| <i>IRF2</i>                 | Interferon Regulatory Factor 2                         | Dermatitis                      | 1  | D |
| <i>MMP9</i>                 | Matrix Metalloproteinase 9                             | Asthma<br>Allergy               | 2  | D |
| <i>MMP12</i>                | Matrix Metalloproteinase 12                            | Asthma                          | NA | D |
| <i>NLRP3</i>                | NLR Family Pyrin Domain Containing 3                   | Food allergy                    | 2  | D |
| <i>NOD1</i>                 | Nucleotide Binding Oligomerization Domain Containing 1 | IgE<br>Asthma                   | 1  | D |
| <i>NOD2</i>                 | Nucleotide Binding Oligomerization Domain Containing 2 | Atopy<br>Dermatitis<br>Rhinitis | NA | D |
| <i>ORAI1</i> <sup>†</sup>   | Calcium Release-Activated Calcium Modulator 1          | Dermatitis                      | 1  | D |
| <i>PLA2G4A</i>              | Phospholipase A2 Group IVA                             | Asthma                          | 2  | D |
| <i>PLA2G7</i>               | Phospholipase A2 Group VII                             | Atopy<br>Asthma                 | 2  | D |
| <i>PTGER2</i>               | Prostaglandin E Receptor 2                             | Asthma                          | 1  | D |
| <i>STAT6</i>                | Signal Transducer And Activator Of Transcription 6     | IgE<br>Dermatitis<br>Asthma     | 3  | D |
| <i>TLR2</i>                 | Toll Like Receptor 2                                   | Dermatitis<br>Asthma            | 1  | D |
| <i>TLR6</i>                 | Toll Like Receptor 6                                   | Asthma                          | 1  | D |
| <i>TLR9</i>                 | Toll Like Receptor 9                                   | Dermatitis<br>Asthma            | 1  | D |
| <i>CCL2</i>                 | C-C Motif Chemokine Ligand 2                           | Asthma                          | NA | E |
| <i>CCL7</i>                 | C-C Motif Chemokine Ligand 7                           | Asthma                          | 1  | E |
| <i>CTLA4</i> <sup>†</sup>   | Cytotoxic T-Lymphocyte Associated Protein 4            | Asthma                          | 1  | F |
| <i>EPHX1</i>                | Epoxide Hydrolase 1                                    | Asthma                          | NA | F |
| <i>ICOS</i> <sup>†</sup>    | Inducible T Cell Costimulator                          | Allergy                         | 1  | F |
| <i>IL2</i>                  | Interleukin 2                                          | Allergy                         | 2  | F |
| <i>IL7R</i> <sup>†</sup>    | Interleukin 7 Receptor                                 | Dermatitis                      | NA | F |
| <i>IL12RB1</i> <sup>†</sup> | Interleukin 12 Receptor Subunit Beta 1                 | Dermatitis                      | 1  | F |
| <i>IL17RB</i>               | Interleukin 17 Receptor B                              | Asthma                          | 1  | F |
| <i>IL21</i> <sup>†</sup>    | Interleukin 21                                         | Asthma                          | 1  | F |
| <i>IL21R</i> <sup>†</sup>   | Interleukin 21 Receptor                                | IgE                             | 1  | F |
| <i>ITK</i> <sup>†</sup>     | Interleukin 2 Inducible T Cell Kinase                  | Asthma                          | 1  | F |
| <i>LTA</i>                  | Lymphotoxin Alpha                                      | Asthma                          | 1  | F |
| <i>PDCD4</i>                | Programmed Cell Death 4                                | Asthma                          | 1  | F |
| <i>PECAMI</i>               | Platelet And Endothelial Cell Adhesion                 | Asthma                          | NA | F |

|                             | Molecule 1                                                          |                             |    |   |
|-----------------------------|---------------------------------------------------------------------|-----------------------------|----|---|
| <i>PPARGC1B</i>             | Peroxisome Proliferator-Activated Receptor Gamma Coactivator 1 Beta | Asthma                      | 2  | F |
| <i>S1PR1</i>                | Sphingosine-1-Phosphate Receptor 1                                  | Asthma                      | 2  | F |
| <i>TBXA2R</i>               | Thromboxane A2 Receptor                                             | IgE<br>Dermatitis<br>Asthma | 2  | F |
| <i>TRAF3IP2<sup>†</sup></i> | TNF Receptor-Associated Factor 3 Interacting Protein 2              | Dermatitis                  | 2  | F |
| <i>ZPBP2</i>                | Zona Pellucida Binding Protein 2                                    | Asthma                      | 2  | F |
| <i>CAT</i>                  | Catalase                                                            | Asthma                      | 1  | G |
| <i>SMPD1</i>                | Sphingomyelin Phosphodiesterase 1                                   | Allergy                     | 1  | G |
| <i>CD53</i>                 | Cluster of Differentiation 53 Molecule                              | Asthma                      | 1  | H |
| <i>DOCK8<sup>†</sup></i>    | Dedicator Of Cytokinesis 8                                          | IgE                         | 45 | H |
| <i>STK10</i>                | Serine/Threonine Kinase 10                                          | Asthma                      | 1  | H |
| <i>TGFB1</i>                | Transforming Growth Factor Beta 1                                   | Asthma                      | NA | H |
| <i>TYK2<sup>†</sup></i>     | Tyrosine Kinase 2                                                   | IgE                         | 1  | H |
| <i>GSTP1</i>                | Glutathione S-Transferase Pi 1                                      | Dermatitis<br>Asthma        | NA | I |
| <i>PGM3<sup>†</sup></i>     | Phosphoglucomutase 3                                                | Atopy<br>IgE                | 6  | I |
| <i>CCL5</i>                 | C-C Motif Chemokine Ligand 5                                        | Dermatitis<br>Asthma        | 1  | J |
| <i>CYSLTR2</i>              | Cysteinyl Leukotriene Receptor 2                                    | Atopy                       | 1  | J |
| <i>IFNG</i>                 | Interferon Gamma                                                    | Atopy                       | NA | J |
| <i>IL12RB2</i>              | Interleukin 12 Receptor Subunit Beta 2                              | Atopy                       | 3  | J |
| <i>TBX21</i>                | T-Box 21                                                            | Asthma                      | 1  | J |
| <i>BDNF</i>                 | Brain Derived Neurotrophic Factor                                   | Asthma                      | NA | K |
| <i>CCL26</i>                | C-C Motif Chemokine Ligand 26                                       | Asthma                      | 1  | K |
| <i>CDHR3</i>                | Cadherin Related Family Member 3                                    | Asthma                      | 1  | K |
| <i>CFTR<sup>†</sup></i>     | Cystic Fibrosis Transmembrane Conductance Regulator                 | Asthma                      | 6  | K |
| <i>CHIA</i>                 | Chitinase, Acidic                                                   | IgE<br>Asthma               | 6  | K |
| <i>CHIT1</i>                | Chitinase 1                                                         | Asthma                      | NA | K |
| <i>DBH</i>                  | Dopamine Beta-Hydroxylase                                           | Asthma                      | NA | K |
| <i>FLG2</i>                 | Filaggrin Family Member 2                                           | Dermatitis                  | 1  | K |
| <i>GC</i>                   | GC, Vitamin D Binding Protein                                       | Asthma                      | NA | K |
| <i>GSDMA</i>                | Gasdermin A                                                         | Asthma                      | 1  | K |
| <i>GSTO2</i>                | Glutathione S-Transferase Omega 2                                   | Asthma                      | NA | K |
| <i>IL9</i>                  | Interleukin 9                                                       | Dermatitis                  | 1  | K |
| <i>IL31</i>                 | Interleukin 31                                                      | Dermatitis                  | 1  | K |
| <i>KLK7</i>                 | Kallikrein Related Peptidase 7                                      | Dermatitis                  | 1  | K |
| <i>NOS1</i>                 | Nitric Oxide Synthase 1                                             | Asthma                      | 1  | K |
| <i>NOS2</i>                 | Nitric Oxide Synthase 2                                             | Atopy                       | NA | K |
| <i>PTGDR</i>                | Prostaglandin D2 Receptor                                           | Asthma<br>Allergy           | 4  | K |
| <i>PTGDR2</i>               | Prostaglandin D2 Receptor 2                                         | Asthma                      | 2  | K |
| <i>SCGB1A1</i>              | Secretoglobin Family 1A Member 1                                    | Asthma                      | 1  | K |

|                            |                                                                      |                               |     |     |
|----------------------------|----------------------------------------------------------------------|-------------------------------|-----|-----|
| <i>SPINK5</i> <sup>†</sup> | Serine Peptidase Inhibitor, Kazal Type 5                             | Atopy<br>Asthma               | 3   | K   |
| <i>TCHHL1</i>              | Trichohyalin Like 1                                                  | Dermatitis                    | 1   | K   |
| <i>TMEM79</i>              | Transmembrane Protein 79                                             | Dermatitis                    | 1   | K   |
| <i>TRPV1</i>               | Transient Receptor Potential Cation Channel Subfamily V Member 1     | Asthma                        | 1   | K   |
| <i>ADAM33</i>              | ADAM Metallopeptidase Domain 33                                      | Asthma                        | NA  | bin |
| <i>ATG5</i>                | Autophagy Related 5                                                  | Asthma                        | 2   | bin |
| <i>CASP8</i> <sup>†</sup>  | Caspase 8                                                            | Asthma                        | NA  | bin |
| <i>CD38</i>                | Cluster of Differentiation 38 Molecule                               | Asthma                        | 1   | bin |
| <i>CEP68</i>               | Centrosomal Protein 68                                               | Asthma                        | 1   | bin |
| <i>CSF2</i>                | Colony Stimulating Factor 2                                          | Dermatitis                    | 1   | bin |
| <i>CSTA</i>                | Cystatin A                                                           | Dermatitis                    | 1   | bin |
| <i>DEFB1</i>               | Defensin Beta 1                                                      | Dermatitis                    | NA  | bin |
| <i>F2RL1</i>               | F2R Like Trypsin Receptor 1                                          | Atopy                         | 1   | bin |
| <i>GRASP</i>               | General Receptor For Phosphoinositides 1 Associated Scaffold Protein | Asthma                        | 1   | bin |
| <i>GSTM1</i>               | Glutathione S-Transferase Mu 1                                       | Dermatitis<br>Asthma          | NA  | bin |
| <i>HAVCR1</i>              | Hepatitis A Virus Cellular Receptor 1                                | Asthma                        | 3   | bin |
| <i>HMGB1</i>               | High Mobility Group Box 1                                            | Dermatitis                    | 3   | bin |
| <i>IL4R</i>                | Interleukin 4 Receptor                                               | Atopy<br>Dermatitis<br>Asthma | 6   | bin |
| <i>IL10</i> <sup>†</sup>   | Interleukin 10                                                       | Asthma                        | NA  | bin |
| <i>IL12B</i> <sup>†</sup>  | Interleukin 12B                                                      | Dermatitis<br>Asthma          | 2   | bin |
| <i>IL17F</i> <sup>†</sup>  | Interleukin 17F                                                      | Asthma                        | 1   | bin |
| <i>KAT6A</i>               | Lysine Acetyltransferase 6A                                          | Food allergy                  | 1   | bin |
| <i>LPL</i>                 | Lipoprotein Lipase                                                   | Dermatitis                    | NA  | bin |
| <i>LTC4S</i>               | Leukotriene C4 Synthase                                              | Asthma<br>Allergy             | 2   | bin |
| <i>MAP3K1</i>              | Mitogen-Activated Protein Kinase 1                                   | Asthma                        | 1   | bin |
| <i>NAT2</i>                | N-Acetyltransferase 2                                                | Asthma                        | 2   | bin |
| <i>NFKBIA</i>              | Nuclear Factor Kappa B Inhibitor Alpha                               | Asthma                        | 1   | bin |
| <i>NR3C1</i>               | Nuclear Receptor Subfamily 3 Group C Member 1                        | Asthma                        | NA  | bin |
| <i>ORMDL3</i>              | Orosomucoid Like 3                                                   | Asthma                        | 3   | bin |
| <i>PAG1</i>                | Phosphoprotein Membrane Anchor With Glycosphingolipid Microdomains 1 | Allergy                       | 1   | bin |
| <i>PHF11</i>               | PHD Finger Protein 11                                                | Dermatitis<br>Asthma          | 2   | bin |
| <i>PTGS2</i>               | Prostaglandin-Endoperoxide Synthase 2                                | Atopy<br>Asthma               | NA  | bin |
| <i>RBFOX1</i>              | RNA Binding Fox-1 Homolog 1                                          | Food allergy                  | 2   | bin |
| <i>SART1</i>               | U4/U6.U5 Tri-SnRNP-Associated Protein 1                              | Atopy                         | 1   | bin |
| <i>SCGB3A2</i>             | Secretoglobin Family 3A Member 2                                     | Asthma                        | 1   | bin |
| <i>STAT3</i> <sup>†</sup>  | Signal Transducer And Activator Of Transcription 3                   | IgE                           | 107 | bin |

|                               |                                                       |                                      |    |     |
|-------------------------------|-------------------------------------------------------|--------------------------------------|----|-----|
| <i>TLR1</i>                   | Toll Like Receptor 1                                  | Asthma                               | NA | bin |
| <i>TNF</i>                    | Tumor Necrosis Factor                                 | Asthma                               | NA | bin |
| <i>TNFRSF13B</i> <sup>†</sup> | Tumor Necrosis Factor Receptor Superfamily Member 13B | Asthma                               | NA | bin |
| <i>TSLP</i>                   | Thymic Stromal Lymphopoietin                          | Asthma                               | 1  | bin |
| <i>ACE</i>                    | Angiotensin I Converting Enzyme                       | Asthma                               | NA | NA  |
| <i>CCL3L1</i>                 | C-C Motif Chemokine Ligand 3 Like 1                   | Asthma                               | NA | NA  |
| <i>CHI3L1</i>                 | Chitinase 3 Like 1                                    | Asthma                               | 1  | NA  |
| <i>CYP2C19</i>                | Cytochrome P450 Family 2 Subfamily C Member 19        | Asthma                               | NA | NA  |
| <i>CYP2J2</i>                 | Cytochrome P450 Family 2 Subfamily J Member 2         | Asthma                               | NA | NA  |
| <i>ERBIN</i>                  | Erb-B2 Interacting Protein                            | IgE                                  | 1  | NA  |
| <i>FCGR2A</i>                 | Fc Fragment Of IgE Receptor Iia                       | Atopy<br>Allergy                     | 1  | NA  |
| <i>FLG</i>                    | Filaggrin                                             | Dermatitis<br>Food allergy<br>Asthma | 62 | NA  |
| <i>FLG10.2</i>                | Fillagrin Alternative Isoform, Repeat 10.2            | Dermatitis                           | NA | NA  |
| <i>FLG11</i>                  | Fillagrin Alternative Isoform, Repeat 11              | Dermatitis<br>Asthma                 | 1  | NA  |
| <i>GSDMB</i>                  | Gasdermin B                                           | Asthma                               | 4  | NA  |
| <i>LCE3C</i>                  | Late Cornified Envelope 3C                            | Dermatitis                           | NA | NA  |
| <i>MUC7</i>                   | Mucin 7, Secreted                                     | Asthma                               | 1  | NA  |
| <i>TLR10</i>                  | Toll Like Receptor 10                                 | Asthma<br>Rhinitis                   | 1  | NA  |
| <i>VSTM1</i>                  | V-Set And Transmembrane Domain Containing 1           | Dermatitis                           | 1  | NA  |

Abbreviations: NA, not available

\* Human atopy-related genes identified in the Human Gene Mutation Database (HGMD) were not available for clustering because they could not be identified in the mouse immune system as used in ImmGen.

<sup>†</sup> Overlapping genes between atopy-related gene list and PID-related gene list (n=22).
