# Supplementary material for: Molecular clustering of genes related to the atopic syndrome: Towards a more tailored approach and personalized medicine?
Source: Springer Nature journal article supplement (doi:10.1186/s13601-019-0273-8), 2019-07-09
Supplement: MOESM2 [file 16910690]

**Additional File 2: Table S2a. Ingenuity pathway analysis – top three pathways of all atopy genes (n=160)**

| <b>Pathways</b>                                                                                                                                                                                                                                                                                                                                                                                                                                                                                               | <b>-log (p-value)<sup>1</sup></b> | <b>Ratio<sup>2</sup></b> | <b>Molecules</b>                                                                                                                                                                              |
|---------------------------------------------------------------------------------------------------------------------------------------------------------------------------------------------------------------------------------------------------------------------------------------------------------------------------------------------------------------------------------------------------------------------------------------------------------------------------------------------------------------|-----------------------------------|--------------------------|-----------------------------------------------------------------------------------------------------------------------------------------------------------------------------------------------|
| T Helper Cell Differentiation                                                                                                                                                                                                                                                                                                                                                                                                                                                                                 | 2,95E01                           | 3,01E-01                 | <i>IL21, STAT6, IFNG, IL4R, IL12RB1, IL10, IL21R, IL6R, IL12RB2, STAT3, TBX21, IL13, IL18, IL2, TGFB1, IL12B, NGFR, ICOS, CD86, IL17F, TNF, IL4</i>                                           |
| Th1 and Th2 Activation Pathway                                                                                                                                                                                                                                                                                                                                                                                                                                                                                | 2,84E01                           | 1,51E-01                 | <i>IL1RL1, IL12RB1, IL31, TBX21, IL2, TGFB1, IL9, IL4, STAT6, IFNG, PTGDR2, IL4R, IL10, HAVCR1, IL6R, TYK2, IL12RB2, STAT3, TLR9, IL13, TSLP, IL18, IL17RB, IL12B, LTA, ICOS, SIPRI, CD86</i> |
| Th2 Pathway                                                                                                                                                                                                                                                                                                                                                                                                                                                                                                   | 2,49E01                           | 1,6E-01                  | <i>STAT6, IFNG, IL4R, PTGDR2, IL12RB1, IL10, HAVCR1, IL1RL1, TYK2, IL12RB2, IL31, TLR9, IL13, TBX21, TSLP, IL17RB, IL2, TGFB1, IL12B, ICOS, IL9, SIPRI, CD86, IL4</i>                         |
| <p><sup>1</sup>The -log (p-value) was calculated using a Fisher's exact test to determine the probability that the association between the atopy-related genes and the pathways is explained by a random chance alone. A -log (p-value) equal to or greater than 1.3, corresponding to a p-value of 0.05, was considered statistically significant.</p> <p><sup>2</sup>The ratio is calculated by the atopy-related genes found in each pathway divided by the total number of molecules in that pathway.</p> |                                   |                          |                                                                                                                                                                                               |

**Additional File 2: Table S2b. Ingenuity pathway analysis - all atopy genes (n=160)**

| <b>Pathways</b>                                                                                       | <b>Molecules</b>                                                                                                                                                                              |
|-------------------------------------------------------------------------------------------------------|-----------------------------------------------------------------------------------------------------------------------------------------------------------------------------------------------|
| T Helper Cell Differentiation                                                                         | <i>IL21, STAT6, IFNG, IL4R, IL12RB1, IL10, IL21R, IL6R, IL12RB2, STAT3, TBX21, IL13, IL18, IL2, TGFB1, IL12B, NGFR, ICOS, CD86, IL17F, TNF, IL4</i>                                           |
| Th1 and Th2 Activation Pathway                                                                        | <i>IL1RL1, IL12RB1, IL31, TBX21, IL2, TGFB1, IL9, IL4, STAT6, IFNG, PTGDR2, IL4R, IL10, HAVCR1, IL6R, TYK2, IL12RB2, STAT3, TLR9, IL13, TSLP, IL18, IL17RB, IL12B, LTA, ICOS, SIPR1, CD86</i> |
| Th2 Pathway                                                                                           | <i>STAT6, IFNG, IL4R, PTGDR2, IL12RB1, IL10, HAVCR1, IL1RL1, TYK2, IL12RB2, IL31, TLR9, IL13, TBX21, TSLP, IL17RB, IL2, TGFB1, IL12B, ICOS, IL9, SIPR1, CD86, IL4</i>                         |
| TREM1 Signaling                                                                                       | <i>NLRP3, IL10, IL1RL1, STAT3, FCGR2B, TLR9, TLR2, TLR10, IL18, NOD2, CCL2, TLR1, TLR6, NOD1, CD86, CSF2, TNF, CCL7</i>                                                                       |
| Neuroinflammation Signaling Pathway                                                                   | <i>BDNF, CCL5, HMGB1, TLR10, CCL2, TGFB1, TLR1, NOS2, CASP8, IL4, IFNG, NLRP3, IL10, IL6R, TYK2, IRAK3, TLR9, CSF1R, TLR2, PLA2G4A, IL18, IL12B, TLR6, CD86, PTGS2, TNF, SLC6A12, MMP9</i>    |
| Altered T Cell and B Cell Signaling in Rheumatoid Arthritis                                           | <i>IL21, IFNG, IL10, TLR9, TLR2, TLR10, IL18, IL12B, TGFB1, IL2, LTA, TLR1, TLR6, CD86, TNFRSF13B, CSF2, TNF, IL4</i>                                                                         |
| Role of Pattern Recognition Receptors in Recognition of Bacteria and Viruses                          | <i>IFNG, NLRP3, IL10, CCL5, IL13, TLR9, TLR2, IL18, NOD2, IL12B, TGFB1, IL2, LTA, TLR1, TLR6, NOD1, CSF2, IL17F, TNF, IL4</i>                                                                 |
| Differential Regulation of Cytokine Production in Intestinal Epithelial Cells by IL-17A and IL-17F    | <i>IFNG, CCL2, IL10, IL12B, IL9, DEFB1, CCL5, CSF2, IL13, IL17F, TNF</i>                                                                                                                      |
| Communication between Innate and Adaptive Immune Cells                                                | <i>IFNG, IL10, CCL5, TLR9, TLR2, TLR10, IL18, IL2, IL12B, TLR6, TLR1, CD86, TNFRSF13B, CSF2, TNF, IL4</i>                                                                                     |
| Th17 Activation Pathway                                                                               | <i>IL21, IFNG, IL12RB1, IL10, IL21R, IL6R, TYK2, DEFB1, IL12RB2, IRAK3, STAT3, IL12B, PTGER2, CSF2, IL17F</i>                                                                                 |
| HMGB1 Signaling                                                                                       | <i>IFNG, IL13, TLR9, HMGB1, IL18, CCL2, IL12B, TGFB1, IL2, NGFR, KAT6A, LTA, CSF2, SERPINE1, IL17F, TNF, IL4</i>                                                                              |
| Role of Macrophages, Fibroblasts and Endothelial Cells in Rheumatoid Arthritis                        | <i>IL10, IL1RL1, IL6R, STAT3, IRAK3, CCL5, TLR9, TLR2, TLR10, IL18, NFKBIA, TRAF3IP2, F2RL1, CCL2, TGFB1, LTA, NGFR, TLR1, TLR6, CSF2, NOS2, TNF</i>                                          |
| Differential Regulation of Cytokine Production in Macrophages and T Helper Cells by IL-17A and IL-17F | <i>CCL2, IL10, IL12B, IL9, CCL5, CSF2, IL13, IL17F, TNF</i>                                                                                                                                   |
| Th1 Pathway                                                                                           | <i>IFNG, IL12RB1, IL10, IL6R, TYK2, IL12RB2, STAT3, TBX21, TLR9, IL18, IL12B, IL2, LTA, ICOS, CD86, IL4</i>                                                                                   |
| Role of Cytokines in Mediating Communication between Immune Cells                                     | <i>IL21, IFNG, IL18, IL2, TGFB1, IL10, IL12B, CSF2, IL13, IL17F, TNF, IL4</i>                                                                                                                 |
| Glucocorticoid Receptor Signaling                                                                     | <i>IFNG, IL10, MAP3K1, STAT3, CCL5, CCL11, IL13, TLR9, NR3C1, HMGB1, SCGB1A1, NFKBIA, CCL2, IL2, TGFB1, PTGS2, CSF2, NOS2, SERPINE1, TNF, ADRB2, IL4</i>                                      |
| Toll-like Receptor Signaling                                                                          | <i>TLR2, IL18, TLR10, NFKBIA, IL1RL1, IL12B, TLR1, MAP3K1, TLR6, CD14, IRAK3, TLR9, TNF</i>                                                                                                   |

|                                                                           |                                                                                                             |
|---------------------------------------------------------------------------|-------------------------------------------------------------------------------------------------------------|
| Hepatic Cholestasis                                                       | <i>IFNG, IL1RL1, IRAK3, IL13, IL18, NFKBIA, IL12B, IL2, TGFB1, NGFR, LTA, CD14, CSF2, IL17F, TNF, IL4</i>   |
| IL-10 Signaling                                                           | <i>IL18, IL4R, NFKBIA, IL1RL1, IL10, FCGR2A, TYK2, CD14, STAT3, FCGR2B, TNF</i>                             |
| IL-12 Signaling and Production in Macrophages                             | <i>TLR2, STAT6, IFNG, IL18, IL12B, TGFB1, IL10, IL12RB1, SERPINA1, IL12RB2, NOS2, TLR9, TNF, IL4</i>        |
| Granulocyte Adhesion and Diapedesis                                       | <i>IL18, SELP, CCL3L1, CCL2, IL1RL1, NGFR, PECAM1, CCL26, CCL5, MMP12, HRH4, CCL11, TNF, MMP9, CCL7</i>     |
| LXR/RXR Activation                                                        | <i>IL18, CCL2, IL1RL1, NGFR, LPL, CD14, SERPINA1, PTGS2, GC, NOS2, TNF, MMP9, CCL7</i>                      |
| Hepatic Fibrosis / Hepatic Stellate Cell Activation                       | <i>IFNG, IL4R, CCL2, TGFB1, IL1RL1, IL10, NGFR, IL6R, CD14, COL6A5, CCL5, SERPINE1, TNF, MMP9, IL4</i>      |
| Atherosclerosis Signaling                                                 | <i>PLA2G4A, IFNG, IL18, CCL2, SELP, TGFB1, LPL, SERPINA1, ALOX5, CCL11, TNF, PLA2G7, MMP9</i>               |
| Role of JAK1 and JAK3 in $\gamma$ c Cytokine Signaling                    | <i>IL7R, IL21, STAT6, IL4R, IL2, IL21R, IL9, STAT3, TLR9, TSLP, IL4</i>                                     |
| Eicosanoid Signaling                                                      | <i>PLA2G4A, PTGDR, LTC4S, TBXA2R, CYSLTR1, PTGS2, PTGER2, ALOX5, CYSLTR2, PLA2G7</i>                        |
| Colorectal Cancer Metastasis Signaling                                    | <i>IFNG, IL6R, TYK2, STAT3, TLR9, TLR2, TLR10, TGFB1, TLR6, TLR1, PTGS2, PTGER2, NOS2, MMP12, TNF, MMP9</i> |
| Crosstalk between Dendritic Cells and Natural Killer Cells                | <i>IFNG, IL18, IL2, IL12B, LTA, CD86, CSF2, TLR9, TNF, IL4</i>                                              |
| NF- $\kappa$ B Signaling                                                  | <i>TLR2, TLR10, IL18, NFKBIA, NGFR, LTA, TLR6, TLR1, MAP3K1, IRAK3, CASP8, TLR9, TNF</i>                    |
| Dendritic Cell Maturation                                                 | <i>TLR2, IL18, NFKBIA, FCGR2A, IL10, IL12B, LTA, NGFR, CD86, CSF2, TLR9, FCGR2B, TNF</i>                    |
| Type I Diabetes Mellitus Signaling                                        | <i>IFNG, NFKBIA, IL2, IL12B, NGFR, LTA, CD86, NOS2, CASP8, TNF</i>                                          |
| Agranulocyte Adhesion and Diapedesis                                      | <i>IL18, SELP, CCL2, CCL3L1, PECAM1, CCL26, CCL5, MMP12, CCL11, TNF, MMP9, CCL7</i>                         |
| Production of Nitric Oxide and Reactive Oxygen Species in Macrophages     | <i>TLR2, IFNG, NFKBIA, NGFR, CAT, MAP3K1, TYK2, SERPINA1, NOS2, TLR9, TNF, IL4</i>                          |
| Role of Hypercytokinemia/hyperchemokines in the Pathogenesis of Influenza | <i>IFNG, IL18, CCL2, IL12B, IL9, CCL5, TNF</i>                                                              |
| MSP-RON Signaling Pathway                                                 | <i>TLR2, IFNG, KLK7, CCL2, IL12B, NOS2, TLR9, TNF</i>                                                       |
| LPS/IL-1 Mediated Inhibition of RXR Function                              | <i>GSTM1, IL18, IL1RL1, NGFR, CAT, MAP3K1, PPARGC1B, CD14, GSTO2, TNF, GSTP1, CYP2C19</i>                   |
| Role of Osteoblasts, Osteoclasts and Chondrocytes in Rheumatoid Arthritis | <i>IFNG, IL18, NFKBIA, IL1RL1, TGFB1, IL10, NGFR, CSF2, TLR9, TNF, CSF1R, IL4</i>                           |
| Fc Epsilon RI Signaling                                                   | <i>BTK, PLA2G4A, FCER1A, MS4A2, CSF2, TLR9, IL13, TNF, IL4</i>                                              |
| IL-6 Signaling                                                            | <i>IL18, NFKBIA, IL1RL1, NGFR, IL6R, CD14, STAT3, TLR9, TNF</i>                                             |
| Acute Phase Response Signaling                                            | <i>IL18, NFKBIA, NGFR, MAP3K1, IL6R, SERPINA1, STAT3, SERPINE1, TNF, NR3C1</i>                              |
| Role of IL-17A in Arthritis                                               | <i>NFKBIA, CCL2, PTGS2, CCL5, TLR9, NOS2, CCL7</i>                                                          |
| iNOS Signaling                                                            | <i>IFNG, NFKBIA, TYK2, CD14, IRAK3, NOS2</i>                                                                |
| Role of NFAT in Regulation of the Immune Response                         | <i>BTK, NFKBIA, FCGR2A, FCER1A, MS4A2, CD86, FCGR2B, TLR9, ITK, ORAI1</i>                                   |
| Hematopoiesis from Pluripotent Stem Cells                                 | <i>IL2, IL10, IL12B, IL9, CSF2, IL4</i>                                                                     |

|                                                            |                                                                         |
|------------------------------------------------------------|-------------------------------------------------------------------------|
| Airway Inflammation in Asthma                              | <i>IL13, TNF, IL4</i>                                                   |
| Role of MAPK Signaling in the Pathogenesis of Influenza    | <i>IFNG, PLA2G4A, CCL2, PTGS2, CCL5, PLA2G7, TNF</i>                    |
| IL-15 Signaling                                            | <i>STAT6, TYK2, STAT3, TLR9, CSF2, TNF, IL4</i>                         |
| Osteoarthritis Pathway                                     | <i>HMGB1, TLR2, IL1RL1, TGFB1, PTGS2, NOS2, MMP12, CASP8, TNF, MMP9</i> |
| Tec Kinase Signaling                                       | <i>BTK, STAT6, TYK2, FCER1A, MS4A2, STAT3, TLR9, TNF, ITK</i>           |
| Renin-Angiotensin Signaling                                | <i>CCL2, MAP3K1, CCL5, STAT3, PTGER2, TLR9, TNF, ACE</i>                |
| IL-17 Signaling                                            | <i>TRAF3IP2, CCL2, PTGS2, CCL11, TLR9, NOS2, IL17F</i>                  |
| MIF-mediated Glucocorticoid Regulation                     | <i>PLA2G4A, NFKBIA, CD14, PTGS2, NR3C1</i>                              |
| CD28 Signaling in T Helper Cells                           | <i>NFKBIA, ARPC1B, IL2, MAP3K1, CD86, TLR9, CTLA4, ITK</i>              |
| Phagosome Formation                                        | <i>TLR2, TLR10, FCGR2A, TLR6, TLR1, FCER1A, TLR9, FCGR2B</i>            |
| Systemic Lupus Erythematosus Signaling                     | <i>IL18, IL2, IL10, FCGR2A, IL6R, CD86, FCGR2B, TLR9, SART1, TNF</i>    |
| STAT3 Pathway                                              | <i>IL4R, IL17RB, TGFB1, NGFR, TYK2, IL9, STAT3</i>                      |
| Inflammasome pathway                                       | <i>IL18, NOD2, NLRP3, CASP8</i>                                         |
| MIF Regulation of Innate Immunity                          | <i>PLA2G4A, NFKBIA, CD14, PTGS2, NOS2</i>                               |
| Role of IL-17F in Allergic Inflammatory Airway Diseases    | <i>TRAF3IP2, CCL2, CSF2, IL17F, CCL7</i>                                |
| T Cell Receptor Signaling                                  | <i>BTK, NFKBIA, PAG1, MAP3K1, TLR9, CTLA4, ITK</i>                      |
| VDR/RXR Activation                                         | <i>IFNG, IL2, IL1RL1, CD14, CCL5, CSF2</i>                              |
| IL-17A Signaling in Airway Cells                           | <i>TRAF3IP2, NFKBIA, TYK2, STAT3, TLR9, CCL11</i>                       |
| Graft-versus-Host Disease Signaling                        | <i>IFNG, IL18, IL2, CD86, TNF</i>                                       |
| Allograft Rejection Signaling                              | <i>IFNG, IL2, IL10, CD86, TNF, IL4</i>                                  |
| TNFR2 Signaling                                            | <i>NFKBIA, LTA, MAP3K1, TNF</i>                                         |
| IL-4 Signaling                                             | <i>STAT6, IL4R, TYK2, TLR9, NR3C1, IL4</i>                              |
| Hematopoiesis from Multipotent Stem Cells                  | <i>IL2, CSF2, IL4</i>                                                   |
| Glutathione-mediated Detoxification                        | <i>GSTM1, LTC4S, GSTO2, GSTP1</i>                                       |
| Ceramide Signaling                                         | <i>NGFR, MAP3K1, SIPR1, SMPD1, TLR9, TNF</i>                            |
| Endothelin-1 Signaling                                     | <i>NOS1, PLA2G4A, PTGS2, PTGER2, TLR9, NOS2, CASP8, PLA2G7</i>          |
| PPAR Signaling                                             | <i>IL18, NFKBIA, IL1RL1, NGFR, PTGS2, TNF</i>                           |
| IL-17A Signaling in Fibroblasts                            | <i>TRAF3IP2, NFKBIA, CCL2, CCL7</i>                                     |
| Antioxidant Action of Vitamin C                            | <i>PLA2G4A, NFKBIA, GSTO2, CSF2, TNF, PLA2G7</i>                        |
| Endocannabinoid Cancer Inhibition Pathway                  | <i>NOS1, TWIST1, SMPD1, TRPV1, CASP8, TLR9, NOS2</i>                    |
| Role of PKR in Interferon Induction and Antiviral Response | <i>IFNG, NFKBIA, CASP8, TNF</i>                                         |
| p38 MAPK Signaling                                         | <i>PLA2G4A, IL18, IL1RL1, TGFB1, IRAK3, TNF</i>                         |
| Pancreatic Adenocarcinoma Signaling                        | <i>TGFB1, TYK2, STAT3, PTGS2, TLR9, MMP9</i>                            |
| CD40 Signaling                                             | <i>NFKBIA, LTA, STAT3, PTGS2, TLR9</i>                                  |
| IL-9 Signaling                                             | <i>IL9, STAT3, TLR9, TNF</i>                                            |
| Xenobiotic Metabolism Signaling                            | <i>GSTM1, CAT, MAP3K1, GSTO2, NOS2, TLR9, TNF, GSTP1, CYP2C19</i>       |
| Autoimmune Thyroid Disease Signaling                       | <i>IL10, IL2, CD86, IL4</i>                                             |

|                                                                      |                                                                 |
|----------------------------------------------------------------------|-----------------------------------------------------------------|
| Primary Immunodeficiency Signaling                                   | <i>IL7R, BTK, ICOS, TNFRSF13B</i>                               |
| TNFR1 Signaling                                                      | <i>NFKBIA, MAP3K1, CASP8, TNF</i>                               |
| Citrulline-Nitric Oxide Cycle                                        | <i>NOS1, NOS2</i>                                               |
| B Cell Receptor Signaling                                            | <i>BTK, NFKBIA, FCGR2A, PAG1, MAP3K1, FCGR2B, TLR9</i>          |
| Gα12/13 Signaling                                                    | <i>BTK, NFKBIA, F2RL1, TBXA2R, MAP3K1, TLR9</i>                 |
| NRF2-mediated Oxidative Stress Response                              | <i>GSTM1, CAT, MAP3K1, GSTO2, TLR9, GSTP1, EPHX1</i>            |
| Role of JAK1, JAK2 and TYK2 in Interferon Signaling                  | <i>IFNG, TYK2, STAT3</i>                                        |
| Role of JAK family kinases in IL-6-type Cytokine Signaling           | <i>IL6R, TYK2, STAT3</i>                                        |
| Leukocyte Extravasation Signaling                                    | <i>BTK, CTNNA3, PECAM1, MMP12, TLR9, MMP9, ITK</i>              |
| Type II Diabetes Mellitus Signaling                                  | <i>NFKBIA, NGFR, MAP3K1, SMPD1, TLR9, TNF</i>                   |
| SPINK1 Pancreatic Cancer Pathway                                     | <i>KLK7, F2RL1, TGFB1, MMP12</i>                                |
| Induction of Apoptosis by HIV1                                       | <i>NFKBIA, NGFR, CASP8, TNF</i>                                 |
| G-Protein Coupled Receptor Signaling                                 | <i>NFKBIA, PTGDR, TBXA2R, SIPR1, STAT3, PTGER2, TLR9, ADRB2</i> |
| Activation of IRF by Cytosolic Pattern Recognition Receptors         | <i>NFKBIA, IL10, LTA, TNF</i>                                   |
| PXR/RXR Activation                                                   | <i>GSTM1, TNF, NR3C1, CYP2C19</i>                               |
| Airway Pathology in Chronic Obstructive Pulmonary Disease            | <i>TNF, MMP9</i>                                                |
| iCOS-iCOSL Signaling in T Helper Cells                               | <i>NFKBIA, IL2, ICOS, TLR9, ITK</i>                             |
| HIF1α Signaling                                                      | <i>NOS1, NOS2, MMP12, TLR9, MMP9</i>                            |
| FXR/RXR Activation                                                   | <i>IL18, LPL, SERPINA1, GC, TNF</i>                             |
| Chemokine Signaling                                                  | <i>CCL2, CCL5, CCL11, CCL7</i>                                  |
| Role of PI3K/AKT Signaling in the Pathogenesis of Influenza          | <i>IFNG, NFKBIA, CCL5, TLR9</i>                                 |
| SPINK1 General Cancer Pathway                                        | <i>IL6R, TYK2, STAT3, TLR9</i>                                  |
| April Mediated Signaling                                             | <i>NFKBIA, MAP3K1, TNFRSF13B</i>                                |
| Adipogenesis pathway                                                 | <i>ATG5, TGFB1, KAT6A, LPL, TNF</i>                             |
| Regulation of the Epithelial-Mesenchymal Transition Pathway          | <i>TGFB1, TYK2, TWIST1, STAT3, TLR9, MMP9</i>                   |
| Oncostatin M Signaling                                               | <i>TYK2, STAT3, CHI3L1</i>                                      |
| CCR3 Signaling in Eosinophils                                        | <i>PLA2G4A, MYLK, CCL26, TLR9, CCL11</i>                        |
| PI3K Signaling in B Lymphocytes                                      | <i>BTK, IL4R, NFKBIA, FCGR2B, IL4</i>                           |
| B Cell Activating Factor Signaling                                   | <i>NFKBIA, MAP3K1, TNFRSF13B</i>                                |
| p70S6K Signaling                                                     | <i>BTK, IL4R, F2RL1, TLR9, IL4</i>                              |
| Small Cell Lung Cancer Signaling                                     | <i>NOS1, NFKBIA, PTGS2, TLR9</i>                                |
| Regulation of IL-2 Expression in Activated and Anergic T Lymphocytes | <i>NFKBIA, TGFB1, IL2, MAP3K1</i>                               |
| Aryl Hydrocarbon Receptor Signaling                                  | <i>GSTM1, TGFB1, GSTO2, TNF, GSTP1</i>                          |
| Leukotriene Biosynthesis                                             | <i>LTC4S, ALOX5</i>                                             |

|                                                      |                                                   |
|------------------------------------------------------|---------------------------------------------------|
| JAK/Stat Signaling                                   | <i>STAT6, TYK2, STAT3, TLR9</i>                   |
| PEDF Signaling                                       | <i>NFKBIA, BDNF, TLR9, CASP8</i>                  |
| Death Receptor Signaling                             | <i>NFKBIA, CASP8, TNF, PARP1</i>                  |
| Superpathway of Citrulline Metabolism                | <i>NOS1, NOS2</i>                                 |
| Apoptosis Signaling                                  | <i>NFKBIA, CASP8, TNF, PARP1</i>                  |
| PDGF Signaling                                       | <i>MAP3K1, TYK2, STAT3, TLR9</i>                  |
| Granzyme B Signaling                                 | <i>CASP8, PARP1</i>                               |
| cAMP-mediated signaling                              | <i>PTGDR, TBXA2R, SIPR1, STAT3, PTGER2, ADRB2</i> |
| CD27 Signaling in Lymphocytes                        | <i>NFKBIA, MAP3K1, CASP8</i>                      |
| PKC $\theta$ Signaling in T Lymphocytes              | <i>NFKBIA, IL2, MAP3K1, CD86, TLR9</i>            |
| Apelin Cardiomyocyte Signaling Pathway               | <i>TGFB1, CAT, MYLK, TLR9</i>                     |
| Retinoic acid Mediated Apoptosis Signaling           | <i>IFNG, CASP8, PARP1</i>                         |
| Apelin Cardiac Fibroblast Signaling Pathway          | <i>TGFB1, SERPINE1</i>                            |
| HGF Signaling                                        | <i>MAP3K1, STAT3, PTGS2, TLR9</i>                 |
| Neuroprotective Role of THOP1 in Alzheimer's Disease | <i>IFNG, KLK7, MMP9, ACE</i>                      |
| PPAR $\alpha$ /RXR $\alpha$ Activation               | <i>NFKBIA, IL1RL1, TGFB1, LPL, CYP2C19</i>        |
| Lymphotoxin $\beta$ Receptor Signaling               | <i>NFKBIA, LTA, TLR9</i>                          |
| NGF Signaling                                        | <i>NGFR, MAP3K1, SMPD1, TLR9</i>                  |
| IL-22 Signaling                                      | <i>TYK2, STAT3</i>                                |
| Glutathione Redox Reactions I                        | <i>GSTM1, GSTP1</i>                               |
| Sphingosine-1-phosphate Signaling                    | <i>SIPR1, SMPD1, CASP8, TLR9</i>                  |
| EGF Signaling                                        | <i>MAP3K1, STAT3, TLR9</i>                        |
| CNTF Signaling                                       | <i>TYK2, STAT3, TLR9</i>                          |
| IL-17A Signaling in Gastric Cells                    | <i>CCL5, TNF</i>                                  |
| Bupropion Degradation                                | <i>CYP2J2, CYP2C19</i>                            |
| ILK Signaling                                        | <i>PTGS2, NOS2, TLR9, TNF, MMP9</i>               |
| Antiproliferative Role of TOB in T Cell Signaling    | <i>IL2, TGFB1</i>                                 |
| Adrenomedullin signaling pathway                     | <i>IL18, LTA, MYLK, TLR9, TNF</i>                 |
| IL-8 Signaling                                       | <i>IL9, PTGS2, IRAK3, TLR9, MMP9</i>              |
| ErbB2-ErbB3 Signaling                                | <i>TYK2, STAT3, TLR9</i>                          |
| Corticotropin Releasing Hormone Signaling            | <i>NOS1, BDNF, PTGS2, NOS2</i>                    |
| GM-CSF Signaling                                     | <i>STAT3, CSF2, TLR9</i>                          |
| Acetone Degradation I (to Methylglyoxal)             | <i>CYP2J2, CYP2C19</i>                            |
| Human Embryonic Stem Cell Pluripotency               | <i>BDNF, TGFB1, SIPR1, TLR9</i>                   |
| Apelin Adipocyte Signaling Pathway                   | <i>GSTM1, CAT, GSTP1</i>                          |
| Neurotrophin/TRK Signaling                           | <i>BDNF, NGFR, TLR9</i>                           |
| Fc $\gamma$ RIIB Signaling in B Lymphocytes          | <i>BTK, FCGR2B, TLR9</i>                          |

|                                                                 |                                          |
|-----------------------------------------------------------------|------------------------------------------|
| Inhibition of Angiogenesis by TSP1                              | <i>TGFBI, MMP9</i>                       |
| Role of JAK2 in Hormone-like Cytokine Signaling                 | <i>TYK2, STAT3</i>                       |
| Macropinocytosis Signaling                                      | <i>CD14, TLR9, CSF1R</i>                 |
| Coagulation System                                              | <i>SERPINA1, SERPINE1</i>                |
| TWEAK Signaling                                                 | <i>NFKBIA, CASP8</i>                     |
| IL-3 Signaling                                                  | <i>STAT6, STAT3, TLR9</i>                |
| Prolactin Signaling                                             | <i>STAT3, TLR9, NR3C1</i>                |
| B Cell Development                                              | <i>IL7R, CD86</i>                        |
| Interferon Signaling                                            | <i>IFNG, TYK2</i>                        |
| Relaxin Signaling                                               | <i>NFKBIA, NOS2, TLR9, MMP9</i>          |
| FGF Signaling                                                   | <i>MAP3K1, STAT3, TLR9</i>               |
| IL-7 Signaling Pathway                                          | <i>IL7R, IFNG, TLR9</i>                  |
| Fcγ Receptor-mediated Phagocytosis in Macrophages and Monocytes | <i>ARPC1B, FCGR2A, CSF2</i>              |
| IL-1 Signaling                                                  | <i>NFKBIA, MAP3K1, IRAK3</i>             |
| LPS-stimulated MAPK Signaling                                   | <i>NFKBIA, CD14, TLR9</i>                |
| NF-κB Activation by Viruses                                     | <i>NFKBIA, MAP3K1, TLR9</i>              |
| FLT3 Signaling in Hematopoietic Progenitor Cells                | <i>STAT6, STAT3, TLR9</i>                |
| Cardiac Hypertrophy Signaling                                   | <i>TGFBI, MAP3K1, IL6R, TLR9, ADRB2</i>  |
| Inhibition of Matrix Metalloproteases                           | <i>MMP12, MMP9</i>                       |
| Phospholipase C Signaling                                       | <i>BTK, PLA2G4A, FCGR2A, FCGR2B, ITK</i> |
| Tight Junction Signaling                                        | <i>TGFBI, NGFR, MYLK, TNF</i>            |
| Acute Myeloid Leukemia Signaling                                | <i>STAT3, TLR9, CSF1R</i>                |
| CTLA4 Signaling in Cytotoxic T Lymphocytes                      | <i>CD86, TLR9, CTLA4</i>                 |
| Estrogen Biosynthesis                                           | <i>CYP2J2, CYP2C19</i>                   |
| RANK Signaling in Osteoclasts                                   | <i>NFKBIA, MAP3K1, TLR9</i>              |
| Prostate Cancer Signaling                                       | <i>NFKBIA, TLR9, GSTP1</i>               |
| Role of RIG1-like Receptors in Antiviral Innate Immunity        | <i>NFKBIA, CASP8</i>                     |
| Germ Cell-Sertoli Cell Junction Signaling                       | <i>TGFBI, MAP3K1, TLR9, TNF</i>          |
| Synaptic Long Term Depression                                   | <i>NOS1, PLA2G4A, NOS2, PLA2G7</i>       |
| Cholecystokinin/Gastrin-mediated Signaling                      | <i>IL18, PTGS2, TNF</i>                  |
| PAK Signaling                                                   | <i>MYLK, TLR9, TNF</i>                   |
| Sertoli Cell-Sertoli Cell Junction Signaling                    | <i>NOS1, MAP3K1, NOS2, TNF</i>           |
| Gas Signaling                                                   | <i>PTGDR, PTGER2, ADRB2</i>              |
| Amyotrophic Lateral Sclerosis Signaling                         | <i>NOS1, CAT, TLR9</i>                   |
| UVA-Induced MAPK Signaling                                      | <i>SMPD1, TLR9, PARP1</i>                |
| Mouse Embryonic Stem Cell Pluripotency                          | <i>TYK2, STAT3, TLR9</i>                 |
| Transcriptional Regulatory Network in Embryonic Stem            | <i>KAT6A, STAT3</i>                      |

|                                                             |                                                 |
|-------------------------------------------------------------|-------------------------------------------------|
| Cells                                                       |                                                 |
| Rac Signaling                                               | <i>ARPC1B, MAP3K1, TLR9</i>                     |
| G <i>α</i> i Signaling                                      | <i>TBXA2R, SIPR1, STAT3</i>                     |
| Sirtuin Signaling Pathway                                   | <i>ATG5, STAT3, NOS2, TNF, PARP1</i>            |
| Nicotine Degradation III                                    | <i>CYP2J2, CYP2C19</i>                          |
| Role of NANOG in Mammalian Embryonic Stem Cell Pluripotency | <i>TYK2, STAT3, TLR9</i>                        |
| fMLP Signaling in Neutrophils                               | <i>NFKBIA, ARPC1B, TLR9</i>                     |
| Role of Tissue Factor in Cancer                             | <i>F2RL1, CSF2, TLR9</i>                        |
| PI3K/AKT Signaling                                          | <i>NFKBIA, TYK2, PTGS2</i>                      |
| Ephrin A Signaling                                          | <i>NGFR, TLR9</i>                               |
| Protein Kinase A Signaling                                  | <i>NFKBIA, TGFB1, NGFR, MAP3K1, MYLK, PTGS2</i> |
| GP6 Signaling Pathway                                       | <i>BTK, COL6A5, TLR9</i>                        |
| Phospholipases                                              | <i>PLA2G4A, PLA2G7</i>                          |
| autophagy                                                   | <i>ATG5, ACE</i>                                |
| Iron homeostasis signaling pathway                          | <i>IL6R, TYK2, STAT3</i>                        |
| Melatonin Degradation I                                     | <i>CYP2J2, CYP2C19</i>                          |
| Nicotine Degradation II                                     | <i>CYP2J2, CYP2C19</i>                          |
| Actin Cytoskeleton Signaling                                | <i>ARPC1B, CD14, MYLK, TLR9</i>                 |
| Superpathway of Melatonin Degradation                       | <i>CYP2J2, CYP2C19</i>                          |
| IL-2 Signaling                                              | <i>IL2, TLR9</i>                                |
| Thrombopoietin Signaling                                    | <i>STAT3, TLR9</i>                              |
| Ovarian Cancer Signaling                                    | <i>PTGS2, TLR9, MMP9</i>                        |
| Myc Mediated Apoptosis Signaling                            | <i>TLR9, CASP8</i>                              |
| Glioma Invasiveness Signaling                               | <i>TLR9, MMP9</i>                               |
| G <i>α</i> q Signaling                                      | <i>BTK, NFKBIA, TLR9</i>                        |
| Axonal Guidance Signaling                                   | <i>ARPC1B, BDNF, NGFR, TLR9, MMP9, ACE</i>      |
| Antiproliferative Role of Somatostatin Receptor 2           | <i>NOS1, TLR9</i>                               |
| Cdc42 Signaling                                             | <i>ARPC1B, MYLK, ITK</i>                        |
| Angiopoietin Signaling                                      | <i>NFKBIA, TLR9</i>                             |
| Growth Hormone Signaling                                    | <i>STAT3, TLR9</i>                              |
| Leptin Signaling in Obesity                                 | <i>STAT3, TLR9</i>                              |
| Erythropoietin Signaling                                    | <i>NFKBIA, TLR9</i>                             |
| Renal Cell Carcinoma Signaling                              | <i>TGFB1, TLR9</i>                              |
| Regulation of Actin-based Motility by Rho                   | <i>ARPC1B, MYLK</i>                             |
| OX40 Signaling Pathway                                      | <i>NFKBIA, IL2</i>                              |
| TGF- $\beta$ Signaling                                      | <i>TGFB1, SERPINE1</i>                          |
| Bladder Cancer Signaling                                    | <i>MMP12, MMP9</i>                              |
| VEGF Family Ligand-Receptor Interactions                    | <i>PLA2G4A, TLR9</i>                            |
| Sumoylation Pathway                                         | <i>NFKBIA, NR3C1</i>                            |
| Molecular Mechanisms of Cancer                              | <i>NFKBIA, TGFB1, TYK2, TLR9, CASP8</i>         |
| RAR Activation                                              | <i>TGFB1, MAP3K1, PARP1</i>                     |
| CDK5 Signaling                                              | <i>BDNF, NGFR</i>                               |
| 3-phosphoinositide Biosynthesis                             | <i>ICOS, CD86, TLR9</i>                         |



|                                                                                 |                               |
|---------------------------------------------------------------------------------|-------------------------------|
| ERK/MAPK Signaling                                                              | <i>PLA2G4A, STAT3, TLR9</i>   |
| Clathrin-mediated Endocytosis Signaling                                         | <i>ARPC1B, SERPINA1, TLR9</i> |
| SAPK/JNK Signaling                                                              | <i>MAP3K1, TLR9</i>           |
| IGF-1 Signaling                                                                 | <i>STAT3, TLR9</i>            |
| Chronic Myeloid Leukemia Signaling                                              | <i>TGFB1, TLR9</i>            |
| Neuropathic Pain Signaling In Dorsal Horn Neurons                               | <i>BDNF, TLR9</i>             |
| AMPK Signaling                                                                  | <i>CFTR, TLR9, ADRB2</i>      |
| Telomerase Signaling                                                            | <i>IL2, TLR9</i>              |
| Integrin Signaling                                                              | <i>ARPC1B, MYLK, TLR9</i>     |
| Circadian Rhythm Signaling                                                      | <i>ADCYAP1R1</i>              |
| Role of NFAT in Cardiac Hypertrophy                                             | <i>TGFB1, MAP3K1, TLR9</i>    |
| RhoA Signaling                                                                  | <i>ARPC1B, MYLK</i>           |
| Apelin Endothelial Signaling Pathway                                            | <i>CCL2, TLR9</i>             |
| Sperm Motility                                                                  | <i>PLA2G4A, PLA2G7</i>        |
| Endocannabinoid Developing Neuron Pathway                                       | <i>STAT3, TLR9</i>            |
| Natural Killer Cell Signaling                                                   | <i>FCGR2A, TLR9</i>           |
| Superpathway of Inositol Phosphate Compounds                                    | <i>ICOS, CD86, TLR9</i>       |
| 14-3-3-mediated Signaling                                                       | <i>TLR9, TNF</i>              |
| Huntington's Disease Signaling                                                  | <i>BDNF, TLR9, CASP8</i>      |
| Signaling by Rho Family GTPases                                                 | <i>ARPC1B, MYLK, TLR9</i>     |
| Phagosome Maturation                                                            | <i>NOS1, ACE</i>              |
| Mitochondrial Dysfunction                                                       | <i>CAT, CASP8</i>             |
| eNOS Signaling                                                                  | <i>TLR9, CASP8</i>            |
| Ephrin Receptor Signaling                                                       | <i>ARPC1B, STAT3</i>          |
| Thrombin Signaling                                                              | <i>MYLK, TLR9</i>             |
| Opioid Signaling Pathway                                                        | <i>NOS1, NFKBIA</i>           |
| GPCR-Mediated Integration of Enteroendocrine Signaling Exemplified by an L Cell | <i>ADRB2</i>                  |
| Actin Nucleation by ARP-WASP Complex                                            | <i>ARPC1B</i>                 |
| Remodeling of Epithelial Adherens Junctions                                     | <i>ARPC1B</i>                 |
| RhoGDI Signaling                                                                | <i>ARPC1B</i>                 |
| Epithelial Adherens Junction Signaling                                          | <i>ARPC1B</i>                 |
| Thyroid Cancer Signaling                                                        | <i>BDNF</i>                   |
| G Beta Gamma Signaling                                                          | <i>BTK</i>                    |
| Tumoricidal Function of Hepatic Natural Killer Cells                            | <i>CASP8</i>                  |
| Cytotoxic T Lymphocyte-mediated Apoptosis of Target Cells                       | <i>CASP8</i>                  |
| Superoxide Radicals Degradation                                                 | <i>CAT</i>                    |

|                                                                      |               |
|----------------------------------------------------------------------|---------------|
| Ethanol Degradation IV                                               | <i>CAT</i>    |
| Pathogenesis of Multiple Sclerosis                                   | <i>CCL5</i>   |
| CCR5 Signaling in Macrophages                                        | <i>CCL5</i>   |
| Nur77 Signaling in T Lymphocytes                                     | <i>CD86</i>   |
| Catecholamine Biosynthesis                                           | <i>DBH</i>    |
| Neuregulin Signaling                                                 | <i>ERBIN</i>  |
| HIPPO signaling                                                      | <i>FRMD6</i>  |
| Ascorbate Recycling (Cytosolic)                                      | <i>GSTO2</i>  |
| Vitamin-C Transport                                                  | <i>GSTO2</i>  |
| Histamine Degradation                                                | <i>HNMT</i>   |
| Role of Lipids/Lipid Rafts in the Pathogenesis of Influenza          | <i>IFNG</i>   |
| Antigen Presentation Pathway                                         | <i>IFNG</i>   |
| Role of Wnt/GSK-3 $\beta$ Signaling in the Pathogenesis of Influenza | <i>IFNG</i>   |
| Role of BRCA1 in DNA Damage Response                                 | <i>IFNG</i>   |
| Protein Ubiquitination Pathway                                       | <i>IFNG</i>   |
| 3-phosphoinositide Degradation                                       | <i>INPP4A</i> |
| Intrinsic Prothrombin Activation Pathway                             | <i>KLK7</i>   |
| Retinol Biosynthesis                                                 | <i>LPL</i>    |
| Triacylglycerol Degradation                                          | <i>LPL</i>    |
| GNRH Signaling                                                       | <i>MAP3K1</i> |
| Cellular Effects of Sildenafil (Viagra)                              | <i>MYLK</i>   |
| 4-1BB Signaling in T Lymphocytes                                     | <i>NFKBIA</i> |
| Hypoxia Signaling in the Cardiovascular System                       | <i>NFKBIA</i> |
| ATM Signaling                                                        | <i>NFKBIA</i> |
| PTEN Signaling                                                       | <i>NGFR</i>   |
| nNOS Signaling in Skeletal Muscle Cells                              | <i>NOS1</i>   |
| nNOS Signaling in Neurons                                            | <i>NOS1</i>   |
| Dopamine-DARPP32 Feedback in cAMP Signaling                          | <i>NOS1</i>   |
| Estrogen Receptor Signaling                                          | <i>NR3C1</i>  |
| Calcium-induced T Lymphocyte Apoptosis                               | <i>ORAI1</i>  |
| BER pathway                                                          | <i>PARP1</i>  |
| DNA Double-Strand Break Repair by Non-Homologous End Joining         | <i>PARP1</i>  |
| Role of Oct4 in Mammalian Embryonic Stem Cell Pluripotency           | <i>PARP1</i>  |
| UDP-N-acetyl-D-glucosamine Biosynthesis II                           | <i>PGM3</i>   |
| GDP-glucose Biosynthesis                                             | <i>PGM3</i>   |

|                                                     |                |
|-----------------------------------------------------|----------------|
| Glucose and Glucose-1-phosphate Degradation         | <i>PGM3</i>    |
| UDP-N-acetyl-D-galactosamine Biosynthesis II        | <i>PGM3</i>    |
| Glycogen Degradation II                             | <i>PGM3</i>    |
| Glycogen Degradation III                            | <i>PGM3</i>    |
| Prostanoid Biosynthesis                             | <i>PTGS2</i>   |
| Fatty Acid $\alpha$ -oxidation                      | <i>PTGS2</i>   |
| Cancer Drug Resistance By Drug Efflux               | <i>PTGS2</i>   |
| GABA Receptor Signaling                             | <i>SLC6A12</i> |
| Sphingomyelin Metabolism                            | <i>SMPD1</i>   |
| UVC-Induced MAPK Signaling                          | <i>SMPD1</i>   |
| Mitotic Roles of Polo-Like Kinase                   | <i>TGFB1</i>   |
| Cell Cycle: G1/S Checkpoint Regulation              | <i>TGFB1</i>   |
| Cyclins and Cell Cycle Regulation                   | <i>TGFB1</i>   |
| Factors Promoting Cardiogenesis in Vertebrates      | <i>TGFB1</i>   |
| Wnt/ $\beta$ -catenin Signaling                     | <i>TGFB1</i>   |
| Role of p14/p19ARF in Tumor Suppression             | <i>TLR9</i>    |
| Docosahexaenoic Acid (DHA) Signaling                | <i>TLR9</i>    |
| Apelin Pancreas Signaling Pathway                   | <i>TLR9</i>    |
| Melanoma Signaling                                  | <i>TLR9</i>    |
| UVB-Induced MAPK Signaling                          | <i>TLR9</i>    |
| Endometrial Cancer Signaling                        | <i>TLR9</i>    |
| ErbB4 Signaling                                     | <i>TLR9</i>    |
| GDNF Family Ligand-Receptor Interactions            | <i>TLR9</i>    |
| Non-Small Cell Lung Cancer Signaling                | <i>TLR9</i>    |
| Estrogen-Dependent Breast Cancer Signaling          | <i>TLR9</i>    |
| Reelin Signaling in Neurons                         | <i>TLR9</i>    |
| HER-2 Signaling in Breast Cancer                    | <i>TLR9</i>    |
| TR/RXR Activation                                   | <i>TLR9</i>    |
| Melanocyte Development and Pigmentation Signaling   | <i>TLR9</i>    |
| ErbB Signaling                                      | <i>TLR9</i>    |
| FAK Signaling                                       | <i>TLR9</i>    |
| VEGF Signaling                                      | <i>TLR9</i>    |
| p53 Signaling                                       | <i>TLR9</i>    |
| Nitric Oxide Signaling in the Cardiovascular System | <i>TLR9</i>    |
| Virus Entry via Endocytic Pathways                  | <i>TLR9</i>    |
| Paxillin Signaling                                  | <i>TLR9</i>    |

|                                                                                                                                                                  |             |
|------------------------------------------------------------------------------------------------------------------------------------------------------------------|-------------|
| Glioma Signaling                                                                                                                                                 | <i>TLR9</i> |
| CXCR4 Signaling                                                                                                                                                  | <i>TLR9</i> |
| Aldosterone Signaling in Epithelial Cells                                                                                                                        | <i>TLR9</i> |
| CREB Signaling in Neurons                                                                                                                                        | <i>TLR9</i> |
| mTOR Signaling                                                                                                                                                   | <i>TLR9</i> |
| EIF2 Signaling                                                                                                                                                   | <i>TLR9</i> |
| Hereditary Breast Cancer Signaling                                                                                                                               | <i>TLR9</i> |
| Regulation of eIF4 and p70S6K Signaling                                                                                                                          | <i>TLR9</i> |
| Breast Cancer Regulation by Stathmin1                                                                                                                            | <i>TLR9</i> |
| Glioblastoma Multiforme Signaling                                                                                                                                | <i>TLR9</i> |
| P2Y Purigenic Receptor Signaling Pathway                                                                                                                         | <i>TLR9</i> |
| Gap Junction Signaling                                                                                                                                           | <i>TLR9</i> |
| Insulin Receptor Signaling                                                                                                                                       | <i>TLR9</i> |
| Apelin Liver Signaling Pathway                                                                                                                                   | <i>TNF</i>  |
| IL-15 Production                                                                                                                                                 | <i>TYK2</i> |
| NOTE: By default, pathways were displayed with a $-\log$ (p-value) cutoff of 1.3, meaning that pathways with a p-value equal to or greater than 0.05 are hidden. |             |

**Additional File 2: Table S2c. Ingenuity pathway analysis – top 3 pathways of atopy genes without ‘bin’ genes (n=108)**

| <b>Pathways</b>                | <b>-log (p-value)<sup>1</sup></b> | <b>Ratio<sup>2</sup></b> | <b>Molecules</b>                                                                                                                                      |
|--------------------------------|-----------------------------------|--------------------------|-------------------------------------------------------------------------------------------------------------------------------------------------------|
| Th1 and Th2 Activation Pathway | 2,37E01                           | 1,19E-01                 | <i>STAT6, IFNG, PTGDR2, IL12RB1, IL1RL1, TYK2, IL6R, IL12RB2, IL31, TBX21, IL13, TLR9, IL18, IL17RB, IL2, TGFB1, LTA, ICOS, IL9, SIPR1, CD86, IL4</i> |
| T Helper Cell Differentiation  | 2,18E01                           | 2,19E-01                 | <i>IL21, IFNG, STAT6, IL12RB1, IL21R, IL6R, IL12RB2, TBX21, IL13, IL18, IL2, TGFB1, NGFR, ICOS, CD86, IL4</i>                                         |
| Th2 Pathway                    | 2,1E01                            | 1,27E-01                 | <i>STAT6, IFNG, PTGDR2, IL12RB1, IL1RL1, TYK2, IL12RB2, IL31, TBX21, IL13, TLR9, IL17RB, IL2, TGFB1, ICOS, IL9, SIPR1, CD86, IL4</i>                  |

<sup>1</sup>The -log (p-value) was calculated using a Fisher’s exact test to determine the probability that the association between the atopy-related genes and the pathways is explained by a random chance alone. A -log (p-value) equal to or greater than 1.3, corresponding to a p-value of 0.05, was considered statistically significant.

<sup>2</sup>The ratio is calculated by the atopy-related genes found in each pathway divided by the total number of molecules in that pathway.

**Additional File 2: Table S2d. Ingenuity pathway analysis – atopy genes without ‘bin’ genes (n=108)**

| <b>Pathways</b>                                                                | <b>Molecules</b>                                                                                                                                      |
|--------------------------------------------------------------------------------|-------------------------------------------------------------------------------------------------------------------------------------------------------|
| Th1 and Th2 Activation Pathway                                                 | <i>STAT6, IFNG, PTGDR2, IL12RB1, IL1RL1, TYK2, IL6R, IL12RB2, IL31, TBX21, IL13, TLR9, IL18, IL17RB, IL2, TGFB1, LTA, ICOS, IL9, SIPR1, CD86, IL4</i> |
| T Helper Cell Differentiation                                                  | <i>IL21, IFNG, STAT6, IL12RB1, IL21R, IL6R, IL12RB2, TBX21, IL13, IL18, IL2, TGFB1, NGFR, ICOS, CD86, IL4</i>                                         |
| Th2 Pathway                                                                    | <i>STAT6, IFNG, PTGDR2, IL12RB1, IL1RL1, TYK2, IL12RB2, IL31, TBX21, IL13, TLR9, IL17RB, IL2, TGFB1, ICOS, IL9, SIPR1, CD86, IL4</i>                  |
| Neuroinflammation Signaling Pathway                                            | <i>IFNG, NLRP3, BDNF, TYK2, IL6R, IRAK3, CCL5, TLR9, CSF1R, TLR2, PLA2G4A, IL18, CCL2, TGFB1, TLR6, CD86, NOS2, MMP9, SLC6A12, IL4</i>                |
| TREM1 Signaling                                                                | <i>TLR2, IL18, NOD2, NLRP3, CCL2, IL1RL1, TLR6, NOD1, CD86, FCGR2B, TLR9, CCL7</i>                                                                    |
| Role of Pattern Recognition Receptors in Recognition of Bacteria and Viruses   | <i>IFNG, NLRP3, CCL5, TLR9, IL13, TLR2, IL18, NOD2, TGFB1, IL2, LTA, TLR6, NOD1, IL4</i>                                                              |
| Th1 Pathway                                                                    | <i>IFNG, IL18, IL2, IL12RB1, LTA, ICOS, TYK2, IL6R, CD86, IL12RB2, TBX21, TLR9, IL4</i>                                                               |
| Altered T Cell and B Cell Signaling in Rheumatoid Arthritis                    | <i>TLR2, IL21, IFNG, IL18, IL2, TGFB1, LTA, TLR6, CD86, TLR9, IL4</i>                                                                                 |
| Atherosclerosis Signaling                                                      | <i>IFNG, PLA2G4A, IL18, SELP, CCL2, TGFB1, SERPINA1, CCL11, ALOX5, PLA2G7, MMP9</i>                                                                   |
| HMGB1 Signaling                                                                | <i>IFNG, IL18, CCL2, IL2, TGFB1, NGFR, LTA, TLR9, IL13, SERPINE1, IL4</i>                                                                             |
| Granulocyte Adhesion and Diapedesis                                            | <i>IL18, SELP, CCL2, IL1RL1, NGFR, CCL26, CCL5, MMP12, HRH4, CCL11, MMP9, CCL7</i>                                                                    |
| Hepatic Fibrosis / Hepatic Stellate Cell Activation                            | <i>IFNG, CCL2, IL1RL1, TGFB1, NGFR, IL6R, CD14, COL6A5, CCL5, SERPINE1, MMP9, IL4</i>                                                                 |
| IL-12 Signaling and Production in Macrophages                                  | <i>TLR2, IFNG, STAT6, IL18, TGFB1, IL12RB1, IL12RB2, SERPINA1, NOS2, TLR9, IL4</i>                                                                    |
| Hepatic Cholestasis                                                            | <i>IFNG, IL18, IL1RL1, IL2, TGFB1, NGFR, LTA, CD14, IRAK3, IL13, IL4</i>                                                                              |
| LXR/RXR Activation                                                             | <i>IL18, CCL2, IL1RL1, NGFR, CD14, SERPINA1, GC, NOS2, MMP9, CCL7</i>                                                                                 |
| Role of Macrophages, Fibroblasts and Endothelial Cells in Rheumatoid Arthritis | <i>IL1RL1, IL6R, CCL5, IRAK3, TLR9, TLR2, IL18, TRAF3IP2, CCL2, TGFB1, LTA, NGFR, TLR6, NOS2</i>                                                      |
| Th17 Activation Pathway                                                        | <i>IL21, IFNG, IL12RB1, IL21R, IL6R, TYK2, IL12RB2, PTGER2, IRAK3</i>                                                                                 |
| Communication between Innate and Adaptive Immune Cells                         | <i>TLR2, IFNG, IL18, IL2, TLR6, CD86, CCL5, TLR9, IL4</i>                                                                                             |
| Eicosanoid Signaling                                                           | <i>PLA2G4A, PTGDR, TBXA2R, CYSLTR1, PTGER2, ALOX5, PLA2G7, CYSLTR2</i>                                                                                |
| Role of JAK1 and JAK3 in $\gamma$ c Cytokine Signaling                         | <i>IL7R, IL21, STAT6, IL2, IL21R, IL9, TLR9, IL4</i>                                                                                                  |
| Role of Cytokines in Mediating Communication between Immune Cells              | <i>IL21, IFNG, IL18, IL2, TGFB1, IL13, IL4</i>                                                                                                        |

|                                                                                                       |                                                                                             |
|-------------------------------------------------------------------------------------------------------|---------------------------------------------------------------------------------------------|
| Glucocorticoid Receptor Signaling                                                                     | <i>IFNG, CCL5, CCL11, IL13, TLR9, SCGB1A1, CCL2, TGFB1, IL2, SERPINE1, NOS2, ADRB2, IL4</i> |
| Colorectal Cancer Metastasis Signaling                                                                | <i>TLR2, IFNG, TGFB1, IL6R, TLR6, TYK2, PTGER2, NOS2, MMP12, TLR9, MMP9</i>                 |
| Differential Regulation of Cytokine Production in Intestinal Epithelial Cells by IL-17A and IL-17F    | <i>IFNG, CCL2, IL9, CCL5, IL13</i>                                                          |
| Toll-like Receptor Signaling                                                                          | <i>TLR2, IL18, IL1RL1, TLR6, CD14, IRAK3, TLR9</i>                                          |
| Crosstalk between Dendritic Cells and Natural Killer Cells                                            | <i>IFNG, IL18, IL2, LTA, CD86, TLR9, IL4</i>                                                |
| Agranulocyte Adhesion and Diapedesis                                                                  | <i>IL18, SELP, CCL2, CCL26, CCL5, MMP12, CCL11, MMP9, CCL7</i>                              |
| Production of Nitric Oxide and Reactive Oxygen Species in Macrophages                                 | <i>TLR2, IFNG, NGFR, CAT, TYK2, SERPINA1, NOS2, TLR9, IL4</i>                               |
| MSP-RON Signaling Pathway                                                                             | <i>TLR2, IFNG, KLK7, CCL2, NOS2, TLR9</i>                                                   |
| Differential Regulation of Cytokine Production in Macrophages and T Helper Cells by IL-17A and IL-17F | <i>CCL2, IL9, CCL5, IL13</i>                                                                |
| Role of Hypercytokinemia/hyperchemokemia in the Pathogenesis of Influenza                             | <i>IFNG, IL18, CCL2, IL9, CCL5</i>                                                          |
| iNOS Signaling                                                                                        | <i>IFNG, TYK2, CD14, IRAK3, NOS2</i>                                                        |
| Fc Epsilon RI Signaling                                                                               | <i>BTK, PLA2G4A, FCER1A, MS4A2, IL13, TLR9, IL4</i>                                         |
| Role of NFAT in Regulation of the Immune Response                                                     | <i>BTK, FCER1A, MS4A2, CD86, TLR9, FCGR2B, ORAI1, ITK</i>                                   |
| LPS/IL-1 Mediated Inhibition of RXR Function                                                          | <i>IL18, IL1RL1, NGFR, CAT, CD14, PPARGC1B, GSTO2, GSTP1</i>                                |
| Type I Diabetes Mellitus Signaling                                                                    | <i>IFNG, IL2, NGFR, LTA, CD86, NOS2</i>                                                     |
| Role of Osteoblasts, Osteoclasts and Chondrocytes in Rheumatoid Arthritis                             | <i>IFNG, IL18, TGFB1, IL1RL1, NGFR, TLR9, CSF1R, IL4</i>                                    |
| Tec Kinase Signaling                                                                                  | <i>BTK, STAT6, TYK2, FCER1A, MS4A2, TLR9, ITK</i>                                           |
| IL-10 Signaling                                                                                       | <i>IL18, IL1RL1, TYK2, CD14, FCGR2B</i>                                                     |
| Role of IL-17A in Arthritis                                                                           | <i>CCL2, CCL5, NOS2, TLR9, CCL7</i>                                                         |
| NF-κB Signaling                                                                                       | <i>TLR2, IL18, NGFR, LTA, TLR6, IRAK3, TLR9</i>                                             |
| VDR/RXR Activation                                                                                    | <i>IFNG, IL1RL1, IL2, CD14, CCL5</i>                                                        |
| Role of MAPK Signaling in the Pathogenesis of Influenza                                               | <i>IFNG, PLA2G4A, CCL2, CCL5, PLA2G7</i>                                                    |
| CD28 Signaling in T Helper Cells                                                                      | <i>ARPC1B, IL2, CD86, TLR9, CTLA4, ITK</i>                                                  |
| Dendritic Cell Maturation                                                                             | <i>TLR2, IL18, NGFR, LTA, CD86, FCGR2B, TLR9</i>                                            |
| IL-6 Signaling                                                                                        | <i>IL18, IL1RL1, NGFR, IL6R, CD14, TLR9</i>                                                 |
| IL-17 Signaling                                                                                       | <i>TRAF3IP2, CCL2, NOS2, TLR9, CCL11</i>                                                    |
| Graft-versus-Host Disease Signaling                                                                   | <i>IFNG, IL18, IL2, CD86</i>                                                                |
| Inflammasome pathway                                                                                  | <i>IL18, NOD2, NLRP3</i>                                                                    |
| Endocannabinoid Cancer Inhibition Pathway                                                             | <i>NOS1, TWIST1, SMPD1, TRPV1, NOS2, TLR9</i>                                               |
| Airway Inflammation in Asthma                                                                         | <i>IL13, IL4</i>                                                                            |

|                                                             |                                                  |
|-------------------------------------------------------------|--------------------------------------------------|
| STAT3 Pathway                                               | <i>IL17RB, TGFB1, NGFR, TYK2, IL9</i>            |
| Citrulline-Nitric Oxide Cycle                               | <i>NOS1, NOS2</i>                                |
| T Cell Receptor Signaling                                   | <i>BTK, PAG1, TLR9, CTLA4, ITK</i>               |
| p38 MAPK Signaling                                          | <i>PLA2G4A, IL18, IL1RL1, TGFB1, IRAK3</i>       |
| HIF1 $\alpha$ Signaling                                     | <i>NOS1, NOS2, MMP12, TLR9, MMP9</i>             |
| Endothelin-1 Signaling                                      | <i>NOS1, PLA2G4A, PTGER2, NOS2, TLR9, PLA2G7</i> |
| Phagosome Formation                                         | <i>TLR2, TLR6, FCER1A, FCGR2B, TLR9</i>          |
| CCR3 Signaling in Eosinophils                               | <i>PLA2G4A, MYLK, CCL26, TLR9, CCL11</i>         |
| Chemokine Signaling                                         | <i>CCL2, CCL5, CCL11, CCL7</i>                   |
| IL-17A Signaling in Airway Cells                            | <i>TRAF3IP2, TYK2, CCL11, TLR9</i>               |
| Leukocyte Extravasation Signaling                           | <i>BTK, CTNNA3, MMP12, TLR9, MMP9, ITK</i>       |
| Osteoarthritis Pathway                                      | <i>TLR2, IL1RL1, TGFB1, NOS2, MMP12, MMP9</i>    |
| IL-17A Signaling in Fibroblasts                             | <i>TRAF3IP2, CCL2, CCL7</i>                      |
| IL-15 Signaling                                             | <i>STAT6, TYK2, TLR9, IL4</i>                    |
| Allograft Rejection Signaling                               | <i>IFNG, IL2, CD86, IL4</i>                      |
| Systemic Lupus Erythematosus Signaling                      | <i>IL18, IL2, IL6R, CD86, FCGR2B, TLR9</i>       |
| IL-4 Signaling                                              | <i>STAT6, TYK2, TLR9, IL4</i>                    |
| MIF Regulation of Innate Immunity                           | <i>PLA2G4A, CD14, NOS2</i>                       |
| Ceramide Signaling                                          | <i>NGFR, S1PR1, SMPD1, TLR9</i>                  |
| Role of IL-17F in Allergic Inflammatory Airway Diseases     | <i>TRAF3IP2, CCL2, CCL7</i>                      |
| Hematopoiesis from Multipotent Stem Cells                   | <i>IL2, IL4</i>                                  |
| Acute Phase Response Signaling                              | <i>IL18, NGFR, IL6R, SERPINA1, SERPINE1</i>      |
| Autoimmune Thyroid Disease Signaling                        | <i>IL2, CD86, IL4</i>                            |
| Hematopoiesis from Pluripotent Stem Cells                   | <i>IL2, IL9, IL4</i>                             |
| Primary Immunodeficiency Signaling                          | <i>IL7R, BTK, ICOS</i>                           |
| Apelin Cardiomyocyte Signaling Pathway                      | <i>TGFB1, CAT, MYLK, TLR9</i>                    |
| Superpathway of Citrulline Metabolism                       | <i>NOS1, NOS2</i>                                |
| G-Protein Coupled Receptor Signaling                        | <i>PTGDR, TBXA2R, S1PR1, PTGER2, TLR9, ADRB2</i> |
| Regulation of the Epithelial-Mesenchymal Transition Pathway | <i>TGFB1, TYK2, TWIST1, TLR9, MMP9</i>           |
| Pancreatic Adenocarcinoma Signaling                         | <i>TGFB1, TYK2, TLR9, MMP9</i>                   |
| iCOS-iCOSL Signaling in T Helper Cells                      | <i>IL2, ICOS, TLR9, ITK</i>                      |
| SPINK1 Pancreatic Cancer Pathway                            | <i>KLK7, TGFB1, MMP12</i>                        |
| Renin-Angiotensin Signaling                                 | <i>CCL2, CCL5, PTGER2, TLR9</i>                  |
| Apelin Cardiac Fibroblast Signaling Pathway                 | <i>TGFB1, SERPINE1</i>                           |
| cAMP-mediated signaling                                     | <i>PTGDR, TBXA2R, S1PR1, PTGER2, ADRB2</i>       |
| Human Embryonic Stem Cell Pluripotency                      | <i>BDNF, TGFB1, S1PR1, TLR9</i>                  |



|                                                             |                                      |
|-------------------------------------------------------------|--------------------------------------|
| Role of JAK1, JAK2 and TYK2 in Interferon Signaling         | <i>IFNG, TYK2</i>                    |
| Role of JAK family kinases in IL-6-type Cytokine Signaling  | <i>IL6R, TYK2</i>                    |
| Role of PI3K/AKT Signaling in the Pathogenesis of Influenza | <i>IFNG, CCL5, TLR9</i>              |
| SPINK1 General Cancer Pathway                               | <i>IL6R, TYK2, TLR9</i>              |
| Antiproliferative Role of TOB in T Cell Signaling           | <i>IL2, TGFB1</i>                    |
| Neurotrophin/TRK Signaling                                  | <i>BDNF, NGFR, TLR9</i>              |
| FcγRIIB Signaling in B Lymphocytes                          | <i>BTK, FCGR2B, TLR9</i>             |
| Macropinocytosis Signaling                                  | <i>CD14, TLR9, CSF1R</i>             |
| JAK/Stat Signaling                                          | <i>STAT6, TYK2, TLR9</i>             |
| IL-7 Signaling Pathway                                      | <i>IL7R, IFNG, TLR9</i>              |
| Glutathione-mediated Detoxification                         | <i>GSTO2, GSTP1</i>                  |
| Synaptic Long Term Depression                               | <i>NOS1, PLA2G4A, NOS2, PLA2G7</i>   |
| Inhibition of Angiogenesis by TSP1                          | <i>TGFB1, MMP9</i>                   |
| Coagulation System                                          | <i>SERPINA1, SERPINE1</i>            |
| MIF-mediated Glucocorticoid Regulation                      | <i>PLA2G4A, CD14</i>                 |
| CTLA4 Signaling in Cytotoxic T Lymphocytes                  | <i>CD86, TLR9, CTLA4</i>             |
| B Cell Development                                          | <i>IL7R, CD86</i>                    |
| Interferon Signaling                                        | <i>IFNG, TYK2</i>                    |
| PPAR Signaling                                              | <i>IL18, IL1RL1, NGFR</i>            |
| B Cell Receptor Signaling                                   | <i>BTK, PAG1, FCGR2B, TLR9</i>       |
| Inhibition of Matrix Metalloproteases                       | <i>MMP12, MMP9</i>                   |
| Xenobiotic Metabolism Signaling                             | <i>CAT, GSTO2, NOS2, TLR9, GSTP1</i> |
| Antioxidant Action of Vitamin C                             | <i>PLA2G4A, GSTO2, PLA2G7</i>        |
| Gαs Signaling                                               | <i>PTGDR, PTGER2, ADRB2</i>          |
| NRF2-mediated Oxidative Stress Response                     | <i>CAT, GSTO2, TLR9, GSTP1</i>       |
| Adrenomedullin signaling pathway                            | <i>IL18, LTA, MYLK, TLR9</i>         |
| Amyotrophic Lateral Sclerosis Signaling                     | <i>NOS1, CAT, TLR9</i>               |
| UVA-Induced MAPK Signaling                                  | <i>SMPD1, TLR9, PARP1</i>            |
| IL-8 Signaling                                              | <i>IL9, IRAK3, TLR9, MMP9</i>        |
| IL-9 Signaling                                              | <i>IL9, TLR9</i>                     |
| Neuroprotective Role of THOP1 in Alzheimer's Disease        | <i>IFNG, KLK7, MMP9</i>              |
| NGF Signaling                                               | <i>NGFR, SMPD1, TLR9</i>             |
| Sphingosine-1-phosphate Signaling                           | <i>S1PR1, SMPD1, TLR9</i>            |
| FXR/RXR Activation                                          | <i>IL18, SERPINA1, GC</i>            |
| Actin Cytoskeleton Signaling                                | <i>ARPC1B, CD14, MYLK, TLR9</i>      |
| GP6 Signaling Pathway                                       | <i>BTK, COL6A5, TLR9</i>             |
| PI3K Signaling in B                                         | <i>BTK, FCGR2B, IL4</i>              |

|                                                                      |                                       |
|----------------------------------------------------------------------|---------------------------------------|
| Lymphocytes                                                          |                                       |
| p70S6K Signaling                                                     | <i>BTK, TLR9, IL4</i>                 |
| Corticotropin Releasing Hormone Signaling                            | <i>NOS1, BDNF, NOS2</i>               |
| Cardiac Hypertrophy Signaling                                        | <i>TGFB1, IL6R, TLR9, ADRB2</i>       |
| Gα12/13 Signaling                                                    | <i>BTK, TBXA2R, TLR9</i>              |
| Aryl Hydrocarbon Receptor Signaling                                  | <i>TGFB1, GSTO2, GSTP1</i>            |
| Phospholipase C Signaling                                            | <i>BTK, PLA2G4A, FCGR2B, ITK</i>      |
| Ephrin A Signaling                                                   | <i>NGFR, TLR9</i>                     |
| Retinoic acid Mediated Apoptosis Signaling                           | <i>IFNG, PARP1</i>                    |
| Phospholipases                                                       | <i>PLA2G4A, PLA2G7</i>                |
| Type II Diabetes Mellitus Signaling                                  | <i>NGFR, SMPD1, TLR9</i>              |
| Lymphotoxin β Receptor Signaling                                     | <i>LTA, TLR9</i>                      |
| Relaxin Signaling                                                    | <i>NOS2, TLR9, MMP9</i>               |
| CNTF Signaling                                                       | <i>TYK2, TLR9</i>                     |
| IL-2 Signaling                                                       | <i>IL2, TLR9</i>                      |
| PKCθ Signaling in T Lymphocytes                                      | <i>IL2, CD86, TLR9</i>                |
| Tight Junction Signaling                                             | <i>TGFB1, NGFR, MYLK</i>              |
| Cdc42 Signaling                                                      | <i>ARPC1B, MYLK, ITK</i>              |
| ErbB2-ErbB3 Signaling                                                | <i>TYK2, TLR9</i>                     |
| Glioma Invasiveness Signaling                                        | <i>TLR9, MMP9</i>                     |
| CD40 Signaling                                                       | <i>LTA, TLR9</i>                      |
| Apelin Adipocyte Signaling Pathway                                   | <i>CAT, GSTP1</i>                     |
| Antiproliferative Role of Somatostatin Receptor 2                    | <i>NOS1, TLR9</i>                     |
| Small Cell Lung Cancer Signaling                                     | <i>NOS1, TLR9</i>                     |
| Regulation of IL-2 Expression in Activated and Anergic T Lymphocytes | <i>IL2, TGFB1</i>                     |
| Renal Cell Carcinoma Signaling                                       | <i>TGFB1, TLR9</i>                    |
| IL-3 Signaling                                                       | <i>STAT6, TLR9</i>                    |
| Regulation of Actin-based Motility by Rho                            | <i>ARPC1B, MYLK</i>                   |
| ILK Signaling                                                        | <i>NOS2, TLR9, MMP9</i>               |
| Axonal Guidance Signaling                                            | <i>ARPC1B, BDNF, NGFR, TLR9, MMP9</i> |
| LPS-stimulated MAPK Signaling                                        | <i>CD14, TLR9</i>                     |
| FLT3 Signaling in Hematopoietic Progenitor Cells                     | <i>STAT6, TLR9</i>                    |
| PEDF Signaling                                                       | <i>BDNF, TLR9</i>                     |
| TGF-β Signaling                                                      | <i>TGFB1, SERPINE1</i>                |
| 3-phosphoinositide Biosynthesis                                      | <i>ICOS, CD86, TLR9</i>               |
| Bladder Cancer Signaling                                             | <i>MMP12, MMP9</i>                    |
| VEGF Family Ligand-Receptor Interactions                             | <i>PLA2G4A, TLR9</i>                  |
| PDGF Signaling                                                       | <i>TYK2, TLR9</i>                     |

|                                                                                 |                               |
|---------------------------------------------------------------------------------|-------------------------------|
| Clathrin-mediated Endocytosis Signaling                                         | <i>ARPC1B, SERPINA1, TLR9</i> |
| Acute Myeloid Leukemia Signaling                                                | <i>TLR9, CSF1R</i>            |
| AMPK Signaling                                                                  | <i>CFTR, TLR9, ADRB2</i>      |
| Prostate Cancer Signaling                                                       | <i>TLR9, GSTP1</i>            |
| Integrin Signaling                                                              | <i>ARPC1B, MYLK, TLR9</i>     |
| CDK5 Signaling                                                                  | <i>BDNF, NGFR</i>             |
| PAK Signaling                                                                   | <i>MYLK, TLR9</i>             |
| Chronic Myeloid Leukemia Signaling                                              | <i>TGFB1, TLR9</i>            |
| Mouse Embryonic Stem Cell Pluripotency                                          | <i>TYK2, TLR9</i>             |
| Neuropathic Pain Signaling In Dorsal Horn Neurons                               | <i>BDNF, TLR9</i>             |
| Superpathway of Inositol Phosphate Compounds                                    | <i>ICOS, CD86, TLR9</i>       |
| Telomerase Signaling                                                            | <i>IL2, TLR9</i>              |
| Rac Signaling                                                                   | <i>ARPC1B, TLR9</i>           |
| Gai Signaling                                                                   | <i>TBXA2R, SIPR1</i>          |
| RhoA Signaling                                                                  | <i>ARPC1B, MYLK</i>           |
| Apelin Endothelial Signaling Pathway                                            | <i>CCL2, TLR9</i>             |
| Signaling by Rho Family GTPases                                                 | <i>ARPC1B, MYLK, TLR9</i>     |
| Sperm Motility                                                                  | <i>PLA2G4A, PLA2G7</i>        |
| Role of NANOG in Mammalian Embryonic Stem Cell Pluripotency                     | <i>TYK2, TLR9</i>             |
| fMLP Signaling in Neutrophils                                                   | <i>ARPC1B, TLR9</i>           |
| Iron homeostasis signaling pathway                                              | <i>IL6R, TYK2</i>             |
| Ovarian Cancer Signaling                                                        | <i>TLR9, MMP9</i>             |
| Gaq Signaling                                                                   | <i>BTK, TLR9</i>              |
| Germ Cell-Sertoli Cell Junction Signaling                                       | <i>TGFB1, TLR9</i>            |
| Sertoli Cell-Sertoli Cell Junction Signaling                                    | <i>NOS1, NOS2</i>             |
| PPAR $\alpha$ /RXR $\alpha$ Activation                                          | <i>IL1RL1, TGFB1</i>          |
| RAR Activation                                                                  | <i>TGFB1, PARP1</i>           |
| ERK/MAPK Signaling                                                              | <i>PLA2G4A, TLR9</i>          |
| Thrombin Signaling                                                              | <i>MYLK, TLR9</i>             |
| Role of NFAT in Cardiac Hypertrophy                                             | <i>TGFB1, TLR9</i>            |
| Molecular Mechanisms of Cancer                                                  | <i>TGFB1, TYK2, TLR9</i>      |
| Protein Kinase A Signaling                                                      | <i>TGFB1, NGFR, MYLK</i>      |
| Huntington's Disease Signaling                                                  | <i>BDNF, TLR9</i>             |
| Sirtuin Signaling Pathway                                                       | <i>NOS2, PARP1</i>            |
| Circadian Rhythm Signaling                                                      | <i>ADCYAP1R1</i>              |
| GPCR-Mediated Integration of Enteroendocrine Signaling Exemplified by an L Cell | <i>ADRB2</i>                  |

|                                                                 |               |
|-----------------------------------------------------------------|---------------|
| Leukotriene Biosynthesis                                        | <i>ALOX5</i>  |
| Actin Nucleation by ARP-WASP Complex                            | <i>ARPC1B</i> |
| Remodeling of Epithelial Adherens Junctions                     | <i>ARPC1B</i> |
| Fcγ Receptor-mediated Phagocytosis in Macrophages and Monocytes | <i>ARPC1B</i> |
| Epithelial Adherens Junction Signaling                          | <i>ARPC1B</i> |
| RhoGDI Signaling                                                | <i>ARPC1B</i> |
| Ephrin Receptor Signaling                                       | <i>ARPC1B</i> |
| Thyroid Cancer Signaling                                        | <i>BDNF</i>   |
| G Beta Gamma Signaling                                          | <i>BTK</i>    |
| Superoxide Radicals Degradation                                 | <i>CAT</i>    |
| Ethanol Degradation IV                                          | <i>CAT</i>    |
| Mitochondrial Dysfunction                                       | <i>CAT</i>    |
| Pathogenesis of Multiple Sclerosis                              | <i>CCL5</i>   |
| IL-17A Signaling in Gastric Cells                               | <i>CCL5</i>   |
| CCR5 Signaling in Macrophages                                   | <i>CCL5</i>   |
| Nur77 Signaling in T Lymphocytes                                | <i>CD86</i>   |
| Catecholamine Biosynthesis                                      | <i>DBH</i>    |
| HIPPO signaling                                                 | <i>FRMD6</i>  |
| Ascorbate Recycling (Cytosolic)                                 | <i>GSTO2</i>  |
| Vitamin-C Transport                                             | <i>GSTO2</i>  |
| Glutathione Redox Reactions I                                   | <i>GSTP1</i>  |
| Histamine Degradation                                           | <i>HNMT</i>   |
| Role of Lipids/Lipid Rafts in the Pathogenesis of Influenza     | <i>IFNG</i>   |
| Antigen Presentation Pathway                                    | <i>IFNG</i>   |
| Role of PKR in Interferon Induction and Antiviral Response      | <i>IFNG</i>   |
| Role of Wnt/GSK-3β Signaling in the Pathogenesis of Influenza   | <i>IFNG</i>   |
| Role of BRCA1 in DNA Damage Response                            | <i>IFNG</i>   |
| Protein Ubiquitination Pathway                                  | <i>IFNG</i>   |
| Cholecystokinin/Gastrin-mediated Signaling                      | <i>IL18</i>   |
| OX40 Signaling Pathway                                          | <i>IL2</i>    |
| 3-phosphoinositide Degradation                                  | <i>INPP4A</i> |
| IL-1 Signaling                                                  | <i>IRAK3</i>  |
| Intrinsic Prothrombin Activation Pathway                        | <i>KLK7</i>   |
| TNFR2 Signaling                                                 | <i>LTA</i>    |
| Activation of IRF by Cytosolic Pattern Recognition Receptors    | <i>LTA</i>    |
| Airway Pathology in Chronic Obstructive Pulmonary Disease       | <i>MMP9</i>   |
| Cellular Effects of Sildenafil                                  | <i>MYLK</i>   |

|                                                              |                |
|--------------------------------------------------------------|----------------|
| (Viagra)                                                     |                |
| Induction of Apoptosis by HIV1                               | <i>NGFR</i>    |
| PTEN Signaling                                               | <i>NGFR</i>    |
| nNOS Signaling in Skeletal Muscle Cells                      | <i>NOS1</i>    |
| nNOS Signaling in Neurons                                    | <i>NOS1</i>    |
| Phagosome Maturation                                         | <i>NOS1</i>    |
| Dopamine-DARPP32 Feedback in cAMP Signaling                  | <i>NOS1</i>    |
| Opioid Signaling Pathway                                     | <i>NOS1</i>    |
| Calcium-induced T Lymphocyte Apoptosis                       | <i>ORAI1</i>   |
| BER pathway                                                  | <i>PARP1</i>   |
| DNA Double-Strand Break Repair by Non-Homologous End Joining | <i>PARP1</i>   |
| Granzyme B Signaling                                         | <i>PARP1</i>   |
| Role of Oct4 in Mammalian Embryonic Stem Cell Pluripotency   | <i>PARP1</i>   |
| Death Receptor Signaling                                     | <i>PARP1</i>   |
| Apoptosis Signaling                                          | <i>PARP1</i>   |
| UDP-N-acetyl-D-glucosamine Biosynthesis II                   | <i>PGM3</i>    |
| GDP-glucose Biosynthesis                                     | <i>PGM3</i>    |
| Glucose and Glucose-1-phosphate Degradation                  | <i>PGM3</i>    |
| UDP-N-acetyl-D-galactosamine Biosynthesis II                 | <i>PGM3</i>    |
| Glycogen Degradation II                                      | <i>PGM3</i>    |
| Glycogen Degradation III                                     | <i>PGM3</i>    |
| GABA Receptor Signaling                                      | <i>SLC6A12</i> |
| Sphingomyelin Metabolism                                     | <i>SMPD1</i>   |
| UVC-Induced MAPK Signaling                                   | <i>SMPD1</i>   |
| Mitotic Roles of Polo-Like Kinase                            | <i>TGFB1</i>   |
| Cell Cycle: G1/S Checkpoint Regulation                       | <i>TGFB1</i>   |
| Cyclins and Cell Cycle Regulation                            | <i>TGFB1</i>   |
| Factors Promoting Cardiogenesis in Vertebrates               | <i>TGFB1</i>   |
| Adipogenesis pathway                                         | <i>TGFB1</i>   |
| Wnt/ $\beta$ -catenin Signaling                              | <i>TGFB1</i>   |
| Role of p14/p19ARF in Tumor Suppression                      | <i>TLR9</i>    |
| Docosahexaenoic Acid (DHA) Signaling                         | <i>TLR9</i>    |
| Apelin Pancreas Signaling Pathway                            | <i>TLR9</i>    |
| Melanoma Signaling                                           | <i>TLR9</i>    |
| UVB-Induced MAPK Signaling                                   | <i>TLR9</i>    |

|                                                     |             |
|-----------------------------------------------------|-------------|
| EGF Signaling                                       | <i>TLR9</i> |
| Endometrial Cancer Signaling                        | <i>TLR9</i> |
| Thrombopoietin Signaling                            | <i>TLR9</i> |
| Myc Mediated Apoptosis Signaling                    | <i>TLR9</i> |
| ErbB4 Signaling                                     | <i>TLR9</i> |
| GM-CSF Signaling                                    | <i>TLR9</i> |
| GDNF Family Ligand-Receptor Interactions            | <i>TLR9</i> |
| Non-Small Cell Lung Cancer Signaling                | <i>TLR9</i> |
| Angiopoietin Signaling                              | <i>TLR9</i> |
| Growth Hormone Signaling                            | <i>TLR9</i> |
| Estrogen-Dependent Breast Cancer Signaling          | <i>TLR9</i> |
| Leptin Signaling in Obesity                         | <i>TLR9</i> |
| Erythropoietin Signaling                            | <i>TLR9</i> |
| Prolactin Signaling                                 | <i>TLR9</i> |
| FGF Signaling                                       | <i>TLR9</i> |
| Reelin Signaling in Neurons                         | <i>TLR9</i> |
| NF- $\kappa$ B Activation by Viruses                | <i>TLR9</i> |
| HER-2 Signaling in Breast Cancer                    | <i>TLR9</i> |
| TR/RXR Activation                                   | <i>TLR9</i> |
| RANK Signaling in Osteoclasts                       | <i>TLR9</i> |
| Melanocyte Development and Pigmentation Signaling   | <i>TLR9</i> |
| ErbB Signaling                                      | <i>TLR9</i> |
| FAK Signaling                                       | <i>TLR9</i> |
| VEGF Signaling                                      | <i>TLR9</i> |
| SAPK/JNK Signaling                                  | <i>TLR9</i> |
| p53 Signaling                                       | <i>TLR9</i> |
| IGF-1 Signaling                                     | <i>TLR9</i> |
| Nitric Oxide Signaling in the Cardiovascular System | <i>TLR9</i> |
| Virus Entry via Endocytic Pathways                  | <i>TLR9</i> |
| HGF Signaling                                       | <i>TLR9</i> |
| Paxillin Signaling                                  | <i>TLR9</i> |
| Glioma Signaling                                    | <i>TLR9</i> |
| Endocannabinoid Developing Neuron Pathway           | <i>TLR9</i> |
| Natural Killer Cell Signaling                       | <i>TLR9</i> |
| Role of Tissue Factor in Cancer                     | <i>TLR9</i> |
| 14-3-3-mediated Signaling                           | <i>TLR9</i> |
| P2Y Purigenic Receptor Signaling Pathway            | <i>TLR9</i> |
| Insulin Receptor Signaling                          | <i>TLR9</i> |
| Hereditary Breast Cancer Signaling                  | <i>TLR9</i> |
| Regulation of eIF4 and p70S6K Signaling             | <i>TLR9</i> |

|                                                                                                                                                                  |             |
|------------------------------------------------------------------------------------------------------------------------------------------------------------------|-------------|
| Aldosterone Signaling in Epithelial Cells                                                                                                                        | <i>TLR9</i> |
| Glioblastoma Multiforme Signaling                                                                                                                                | <i>TLR9</i> |
| CXCR4 Signaling                                                                                                                                                  | <i>TLR9</i> |
| eNOS Signaling                                                                                                                                                   | <i>TLR9</i> |
| Gap Junction Signaling                                                                                                                                           | <i>TLR9</i> |
| CREB Signaling in Neurons                                                                                                                                        | <i>TLR9</i> |
| mTOR Signaling                                                                                                                                                   | <i>TLR9</i> |
| EIF2 Signaling                                                                                                                                                   | <i>TLR9</i> |
| Breast Cancer Regulation by Stathmin1                                                                                                                            | <i>TLR9</i> |
| IL-22 Signaling                                                                                                                                                  | <i>TYK2</i> |
| IL-15 Production                                                                                                                                                 | <i>TYK2</i> |
| Role of JAK2 in Hormone-like Cytokine Signaling                                                                                                                  | <i>TYK2</i> |
| Oncostatin M Signaling                                                                                                                                           | <i>TYK2</i> |
| PI3K/AKT Signaling                                                                                                                                               | <i>TYK2</i> |
| NOTE: By default, pathways were displayed with a $-\log$ (p-value) cutoff of 1.3, meaning that pathways with a p-value equal to or greater than 0.05 are hidden. |             |
